# Comparative Transcriptome Profiling of the Early Response to *Magnaporthe oryzae* in Durable Resistant vs Susceptible Rice (*Oryza sativa* L.) Genotypes

Paolo Bagnaresi<sup>1</sup>, Chiara Biselli<sup>2</sup>, Luigi Orrù<sup>1</sup>, Simona Urso<sup>1</sup>, Laura Crispino<sup>3</sup>, Pamela Abbruscato<sup>3</sup>, Pietro Piffanelli<sup>3</sup>, Elisabetta Lupotto<sup>4</sup>, Luigi Cattivelli<sup>1</sup>, Giampiero Valè<sup>1,2\*</sup>

**1** Consiglio per la Ricerca e la Sperimentazione in Agricoltura-Genomics Research Centre, Fiorenzuola d'Arda, Piacenza, Italy, **2** Consiglio per la Ricerca e la Sperimentazione in Agricoltura-Rice Research Unit, Vercelli, Italy, **3** Parco Tecnologico Padano, Lodi, Italy, **4** Consiglio per la Ricerca e la Sperimentazione in Agricoltura-Department of Plant Biology and Crop Production, Roma, Italy

## Abstract

Durable resistance to blast, the most significant fungal disease of rice, represents an agronomically relevant character. Gigante Vercelli (GV) and Vialone Nano (VN) are two old temperate *japonica* Italian rice cultivars with contrasting response to blast infection: GV displays durable and broad resistance while VN is highly susceptible. RNA-seq was used to dissect the early molecular processes deployed during the resistance response of GV at 24 h after blast inoculation. Differential gene expression analysis identified 1,070 and 1,484 modulated genes, of which 726 and 699 were up regulated in response to infection in GV and VN, respectively. Gene ontology (GO) enrichment analyses revealed a set of GO terms enriched in both varieties but, despite this commonality, the gene sets contributing to common GO enriched terms were dissimilar. The expression patterns of genes grouped in GV-specific enriched GO terms were examined in detail including at the transcript isoform level. GV exhibited a dramatic up-regulation of genes encoding diterpene phytoalexin biosynthetic enzymes, flavin-containing monooxygenase, class I chitinase and glycosyl hydrolase 17. The sensitivity and high dynamic range of RNA-seq allowed the identification of genes critically involved in conferring GV resistance during the early steps of defence perception-signalling. These included chitin oligosaccharides sensing factors, wall associated kinases, MAPK cascades and WRKY transcription factors. Candidate genes with expression patterns consistent with a potential role as GV-specific functional resistance (*R*) gene(s) were also identified. This first application of RNA-seq to dissect durable blast resistance supports a crucial role of the prompt induction of a battery of responses including defence-related genes as well as members of gene families involved in signalling and pathogen-related gene expression regulation.

**Citation:** Bagnaresi P, Biselli C, Orrù L, Urso S, Crispino L, et al. (2012) Comparative Transcriptome Profiling of the Early Response to *Magnaporthe oryzae* in Durable Resistant vs Susceptible Rice (*Oryza sativa* L.) Genotypes. PLoS ONE 7(12): e51609. doi:10.1371/journal.pone.0051609

**Editor:** Els J M van Damme, Ghent University, Belgium

**Received:** July 18, 2012; **Accepted:** November 2, 2012; **Published:** December 12, 2012

**Copyright:** © 2012 Bagnaresi et al. This is an open-access article distributed under the terms of the Creative Commons Attribution License, which permits unrestricted use, distribution, and reproduction in any medium, provided the original author and source are credited.

**Funding:** This study was funded by grants from AGER Foundation, (RISINNOVA project grant n° 2010–2369) to GV and L. Cattivelli. The funder had no role in study design, data collection and analysis, decision to publish, or preparation of the manuscript.

**Competing Interests:** The authors have declared that no competing interests exist

\* E-mail: giampiero.vale@entecra.it

## Introduction

World-wide rice production is severely affected by rice blast, a major fungal disease caused by *Magnaporthe oryzae*, which can lead to yield losses of up to 50–70% [1,2]. The blast fungus mechanically breaches the leaf epidermis using an appressorium, a dome shaped cell that generates enormous turgor pressure [3,4]. The appressorium produces a specialized hypha, a penetration peg, which pierces the leaf surface. Upon reaching the epidermal cell lumen, the penetration peg expands to form a narrow filamentous primary hypha. In compatible interactions, primary hyphae differentiate into thicker, bulbous invasive hyphae that fill the initially invaded cells and then move into neighbouring cells [5,6]. *M. oryzae* has been described as a hemibiotrophic pathogen [4]. The initial plant cell invasion is defined as biotrophic, because invaded cells appear healthy and retain the ability to plasmolyze [7]. A necrotrophic phase follows, during which the pathogen induces host cell death. In compatible interactions the fungus penetrates the host cells at 24 h post inoculation (hpi), then

invasive hyphae grow in the first invaded cell for 8 to 12 hours, often filling it up. A time-dependent switch occurs during this period because invasive hyphae spread into neighbouring cells between 32 and 36 hpi no matter how quickly, or how completely, the first cell has been filled with fungus [6]. Compatible rice cells containing invasive hyphae plasmolyze at 27 hpi, suggesting that the cell's plasma membrane is intact and functional at this time, while they fail to plasmolyze after 32 hpi, indicating that the plasma membrane is no longer active and the cell is not viable when the fungus moves to the neighbouring cells [6]. During a major resistance gene-mediated incompatible interaction, most invaded host cells fail to plasmolyze within 27 hpi suggesting that at this time point resistance gene-dependent defence reactions have already damaged membrane integrity [6,7]. Molecular analyses before 27 hpi in a resistant genotype should therefore highlight defence pathways activated during the resistance response.

Breeding for durable blast resistance is a difficult task due to both the high degree of pathogenic variability of *M. oryzae* [8] and

the large number of fungal races encountered in the field population. Currently, more than 70 blast disease resistance (R) genes have been identified [9,10], but evolution of the pathogen necessitates continuous screening efforts to uncover new broad spectrum and durable sources of resistance. Several blast R genes, all located in the same region of rice chromosome 6, confer broad-spectrum resistance to different sets of blast strains, e.g. *Pi9*, *Pi2* and *Piz-t* [11–15]. Partial resistance conferred by QTLs is generally more durable and non-race specific [16], and up to now several blast resistance QTLs have been mapped (reviewed in [10]), while the genes underlying two of them, *pi21* and *Pb1*, have also been cloned [17,18].

A dissection of the molecular processes deployed by R genes during blast infection have been already investigated using microarrays in several experimental systems: e.g. rice carrying the R gene *Pi33* infected with *M. oryzae* strain carrying the avirulence gene *ACE1* [19], resistant *vs.* susceptible NILs differing for the introgression of the *Pi-k* gene [20], and genotypes carrying partial resistance genes [21]. A collection of ESTs from resistant, partially resistant and susceptible infected rice leaves has also been created [22]. These studies allowed the identification of the main biological processes and functional categories of defence-related genes responsive to rice blast. Nevertheless, to the best of our knowledge, the whole transcriptome sequencing (RNA-Seq) approach has never been used to compare defence responses in resistant *vs.* susceptible rice-blast interactions. RNA-Seq is increasingly used for gene expression profiling in plants [23–25] as it provides significant advantages over traditional microarray analysis: e.g. accurate quantification of gene expression with low background, high sensitivity and the capability of detecting differential expression over a large dynamic range, high reproducibility for both technical and biological replicates as well as the possibility of detecting novel splicing isoforms and boundaries of un-translated regions at single nucleotide resolution [26,27].

Despite being poorly characterized, Gigante Vercelli (GV), an old Italian variety released in 1946 (*japonica* group), exhibits a considerable durable and broad spectrum blast resistance that has lasted for more than 60 years. Upon infection, GV typically shows many pin-point lesions without further progress of the infection process [28,29]; current genetic investigations suggest that major resistance gene(s) govern GV response to blast (unpublished data).

In this work, RNA-Seq was used to identify early post inoculation transcriptional changes distinct to GV as compared to Vialone Nano (VN), a fully blast susceptible cultivar. GV-specific response was characterized by a prompt induction and fine regulation of a battery of processes including up-regulation of diterpene phytoalexin biosynthetic (DPB) genes, perception and signalling through wall associated kinases (*WAKs*), chitin sensors, *WRKY* and *MAPKKK* genes families, activation of defence genes such as chitinase, glycosyl hydrolase and a regulated expression of resistance gene analogs.

## Results and Discussion

### Identification of Blast Infection-related Differentially Expressed Genes (DEG)

RNA isolated from leaves of Gigante Vercelli (GV) and Vialone Nano (VN), 24 h after inoculation (hai) with the blast fungus *Magnaporthe oryzae* or after mock inoculation, was subjected to paired-end whole transcriptome sequencing. Three biological replicates were performed for each rice genotype (GV *vs* VN) and condition (mock *vs* blast-inoculated). The raw reads obtained from the Illumina Genome Analyzer IIX were filtered (Illumina passed-

filter call) and further checked for sequence contaminants with the fastQC application. About 40 million pairs of filtered 37 base reads obtained for each biological replicate (Table 1), were mapped with Bowtie/TopHat to the rice genome sequence (*O. sativa* Japonica Group cultivar Nipponbare; ENSEMBL release 6.12). Assuming a transcriptome size of about 100 Mb (1,444 bp median length  $\times$  68,682 transcripts; ENSEMBL cDNA release 6.12), we attained a mean coverage of  $27\times$  per biological replicate. In agreement with recent rice RNA-seq experiments [30], a relevant fraction of reads (from 8 to 23% of total mapped reads; Table 1) corresponded to intergenic regions, suggesting the presence of as yet uncharacterized transcriptionally active regions. Upon deduplication of PCR duplicates, read counts were obtained from SAM alignment files with HTSeq software. Differentially expressed genes (DEGs) were called with DESeq. An RPKM (Reads per Kilobase per Million) cutoff value of 0.1 was set to declare a locus expressed [31] resulting in 30,890 and 28,109 loci passing the expression cutoff for GV and VN, respectively. High Spearman correlation coefficients of the expression values ( $>0.95$ ) were observed when genotypes and treatments were compared, indicating a good level of reproducibility among biological replicates (Figure S1).

For the calling of DEGs, the False Discovery Rate (FDR) threshold was set to 0.05 and a combination of fitted versus per-gene dispersion values (Figure S2) was implemented as suggested by the default DESeq settings. As shown in the Venn diagram in Figure 1, 1,070 DEGs were identified in GV (of which 65 were GV-specific expressed loci, 125 were also called as DEGs in VN and 880 were genes called as DEGs in GV only but expressed also in VN), while 1,484 DEGs were identified in VN (consisting of 53 VN-specific expressed loci, 125 common DEGs and 1306 called as DEGs in VN only but as expressed loci also in GV). It is notable that the defence responses of the two genotypes were largely different, with only 125 DEGs in common, and that the number of DEGs was higher in the susceptible (VN) than in the resistant genotype (GV). The latter observation may be attributed to the successful establishment of infection in the susceptible variety resulting in complex adaptive mechanisms to the hemibiotrophic lifestyle of *M. oryzae* ([32], and references therein). However, mean expression *versus* log fold change plots (MA-plots) (Figure 2A, B) illustrated that among the DEGs, the proportion of up-regulated genes was higher in GV (726 or 67.8%) than in VN (699 or 47.1%). Indeed, a global view of the genes monitored during the experiments indicated that a substantial down-regulation of genes occurred in VN, contributing to the higher number of modulated genes in the blast susceptible genotype (Figure 2C). Down-regulated genes, in both GV and VN, were principally involved in photosynthesis-related processes and metabolism of photosynthesis-associated compounds. In down-regulated VN genes, a particular emphasis on chloroplast-related and carotenoid biosynthetic genes (GO:0016117) was observed. Photosynthetic and carotenoid genes were previously shown to be down-regulated during *M. grisea* infection in both compatible and incompatible interactions ([19] and references therein; [20]) and the reater extent of down-regulation of these GO groups in VN with respect to GV is likely related to the fast infection progression in the susceptible genotype. Expression values for DEGs and all the transcribed genes detected in the experiment are reported in Table S1.

### GO Enrichment Analysis

GO enrichment analysis in RNA-Seq experiments poses specific challenges as the status of modulated genes (i.e. DEG classification) is related to the read counts and thus biases in favour of longer and

**Table 1.** Numbers of aligned and mapped reads.

| Samples                | Total filtered Pair-end reads | Total mapped reads | Reads mapping in intergenic regions | Aligned bases | Uniquely mapping reads |
|------------------------|-------------------------------|--------------------|-------------------------------------|---------------|------------------------|
| GV <sup>a</sup> mock 1 | 2×41,647,574                  | 78,544,360         | 18,146,784                          | 2,906,141,320 | 41,075,176             |
| GV mock 2              | 2×44,165,006                  | 83,144,389         | 13,433,235                          | 3,076,342,393 | 43,449,446             |
| GV mock 3              | 2×42,642,301                  | 80,326,551         | 14,438,901                          | 2,972,082,387 | 42,048,286             |
| GV blast 1             | 2×37,886,777                  | 71,008,350         | 11,889,351                          | 2,627,308,950 | 37,132,384             |
| GV blast 2             | 2×44,572,662                  | 82,648,615         | 14,875,748                          | 3,057,998,755 | 43,779,698             |
| GV blast 3             | 2×34,171,043                  | 63,636,891         | 10,899,064                          | 2,354,564,967 | 33,587,892             |
| VN <sup>a</sup> mock 1 | 2×43,315,664                  | 81,797,448         | 12,594,315                          | 3,026,505,576 | 42,363,534             |
| VN mock 2              | 2×42,782,371                  | 80,418,573         | 8,181,024                           | 2,975,487,201 | 41,718,338             |
| VN mock 3              | 2×32,326,921                  | 60,941,220         | 9,072,029                           | 2,254,825,140 | 31,553,233             |
| VN blast 1             | 2×41,169,424                  | 76,528,664         | 7,091,526                           | 2,831,560,568 | 39,854,171             |
| VN blast 2             | 2×33,448,669                  | 61,907,658         | 5,993,239                           | 2,290,583,346 | 32,258,965             |
| VN blast 3             | 2×31,139,332                  | 57,774,685         | 4,513,106                           | 2,137,663,345 | 30,091,261             |

<sup>a</sup>GV = Gigante Vercelli; VN = Vialone Nano.  
doi:10.1371/journal.pone.0051609.t001

highly expressed genes are expected [33]. The length-related bias, in particular, cannot be neglected as for microarray-based expression studies where probes are of similar or identical length within a given platform. The goseq R package [33] has been conceived to address these RNA-Seq specific biases and, to this

end, requires the input of gene lengths based on the median length of transcripts associated with each locus.

For both varieties, the DEGs estimated by DESeq package were used as a test set for goseq input. Goseq output (threshold FDR <= 0.05) yielded 70 and 55 enriched GO terms for GV and VN,

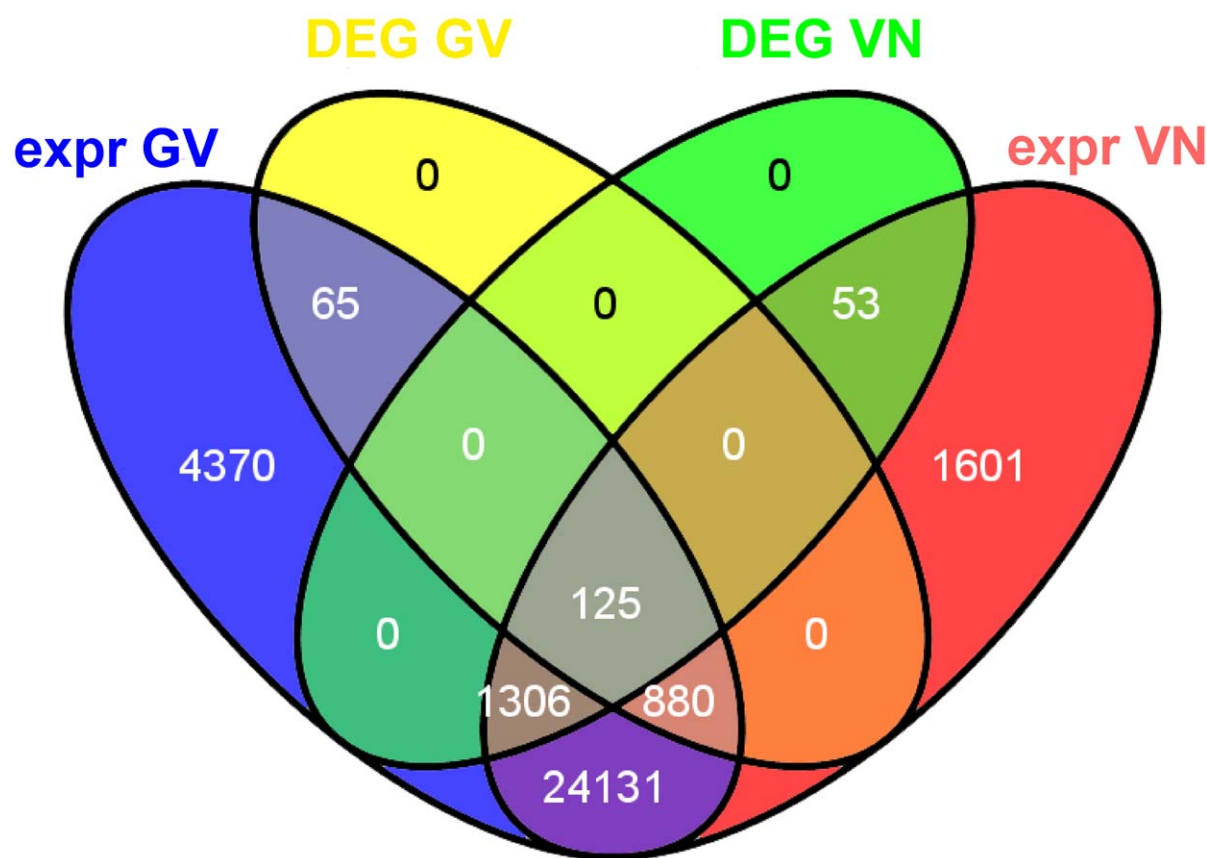

**Figure 1. Venn diagrams of total and blast-modulated genes.** Venn diagrams illustrating the relationships between total expressed (expr) genes and DEGs after blast inoculation in the two rice genotypes Gigante Vercelli (GV) and Vialone Nano (VN).  
doi:10.1371/journal.pone.0051609.g001

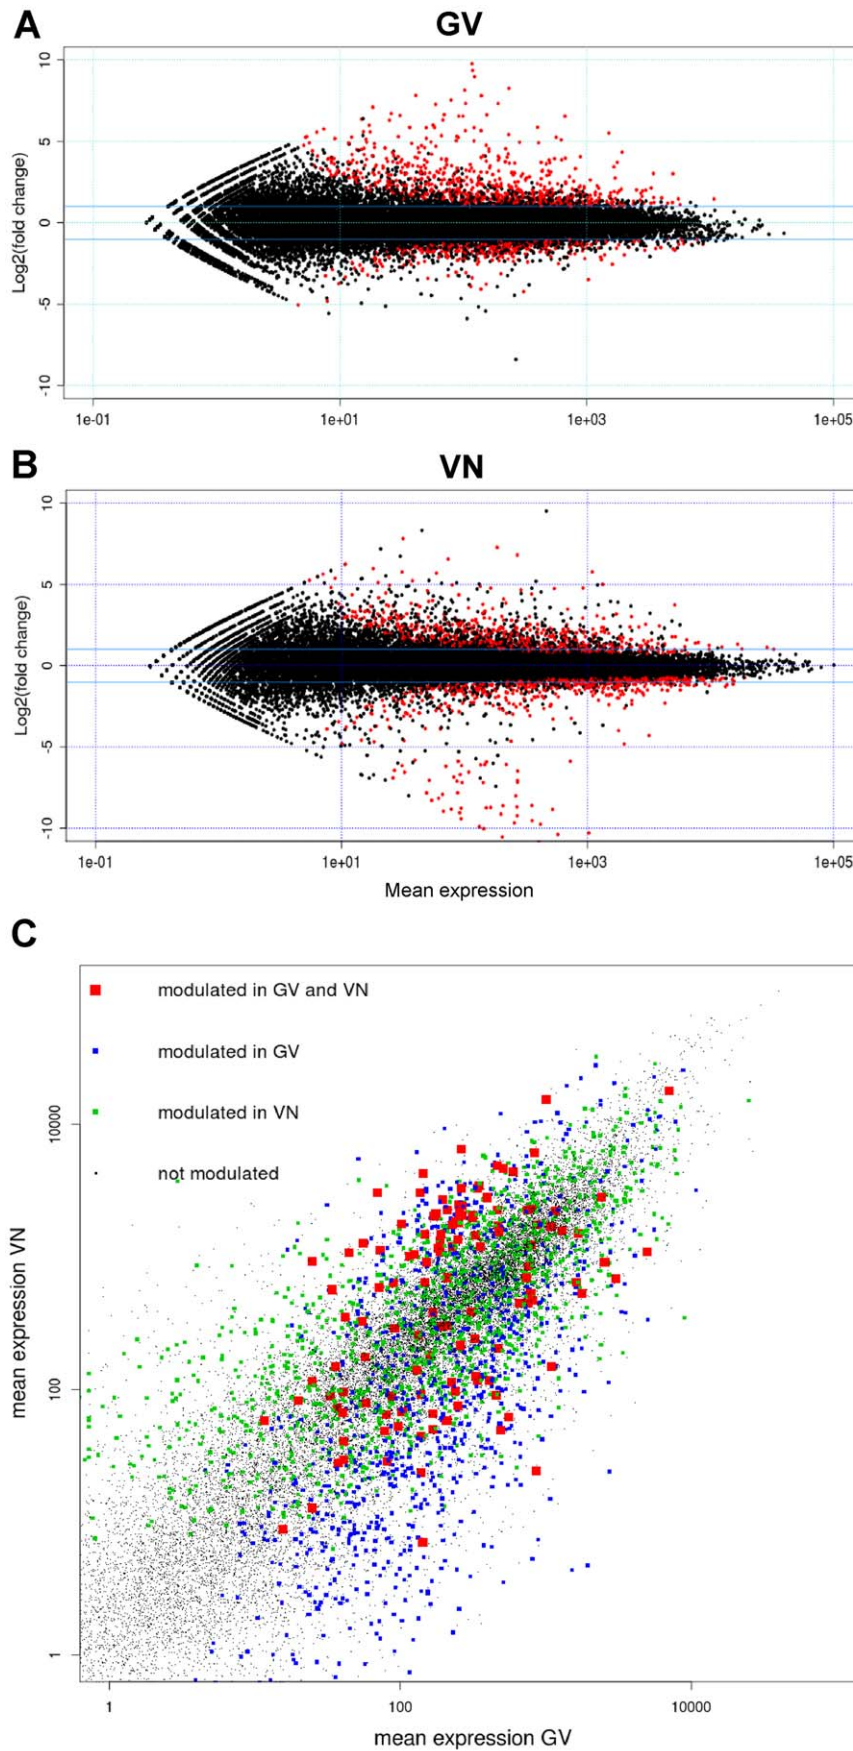

**Figure 2. Global overview of Gigante Vercelli (GV) and Vialone Nano (VN) transcriptional changes.** Mean expression *versus* log fold change plots (MA-plots) were computed for GV (A) and VN (B); normalised expression mean values are plotted *versus* log2 fold changes and called DEGs (FDR <0.05) are plotted in red. (C) Mean expression values (averages of mock and infected) were plotted on x and y axis for GV and VN, respectively. Genes called as DEG in both varieties, in GV only, in VN only or in neither genotype are plotted in red, blue, green and black, respectively. doi:10.1371/journal.pone.0051609.g002

respectively (Figure 3). Common (29 GO), GV-specific (41 GO) and VN-specific (26 GO) enriched terms were identified, highlighting a substantial higher number of terms associated to the resistant response in comparison to the susceptible one. Several of the 29 enriched terms shared by the two rice genotypes were consistent with responses to fungal infection; these included “defence response to fungus, incompatible interaction” (GO:0009817), “apoplast” (GO:0048046), “cell wall” (GO:0005618, connected to defence-related secreted proteins and cell wall reinforcement) and oxido-reductive reactions (GO:0016491; GO:0055114; GO:0009055), typical terms of defence-related oxidative bursts and reactive oxygen species (ROS) generation/detoxification. However, despite these similarities, careful consideration of the individual genes contributing to the common enriched GO terms revealed substantial diversity between genotypes. For example, 13 and 7 genes in the group “defence response to fungus, incompatible interaction” (51 genes in GO release MSU6.12) were modulated in GV and VN, respectively, but only 3 of them, two putative thaumatins and WIP3 (Wound-Induced Protein precursor) were shared between the two genotypes (Table 2). Apart from this GO group, gene-level dissection of further shared GO terms enriched in both varieties showed that the gene pool contributing to the enrichment of the common categories was heterogeneous between GV and VN. This observation reflects the distinct responses of the two varieties to infection.

Conversely, several GO terms were genotype-specific. The term “defence response to fungus” (GO:0050832) was enriched solely in GV, since genes involved in the general fungal defence responses, including activation of flavin-containing mono-oxygenase and chitinases, were found in GV but not in VN (see Table S1 and Table 6). Additionally, only GV exhibited enrichment in further terms, including “diterpene phytoalexin metabolic process” (GO:0051501), “diterpene phytoalexin precursor biosynthetic process pathway” (GO:0051504), “calcium ion binding” (GO:0005509), “peroxidase activity” (GO:0004601), “chitinase activity” (GO:0004568), “response to oxidative stress”, (GO:0006979) and “chitin catabolic process” (GO:0006032). Furthermore, when only up-regulated DEGs were considered for both GV and VN, a further GV-specific enriched GO term was revealed, namely “sequence-specific DNA binding transcription factor activity” (GO:0003700). The above GO groups, being GV-specific, are promising candidates for revealing genes underpinning GV resistance and are examined in more detail in the following sections.

### Diterpene Phytoalexin Genes Group

In rice, 15 phytoalexins (PA) have been characterized [34] and much effort has been dedicated to the characterization of the diterpene phytoalexins in particular. Experimental evidence points to leaf accumulation of the diterpene phytoalexins phytocassanes, momilactones and oryzalexins as critical responses in counter-acting *M. oryzae* infection [35,36,37]. Upon blast infection in rice, these compounds accumulate specifically at the edges of necrotic lesions preventing fungal spore germination and germ tube growth [37,38]. Diterpene phytoalexin biosynthetic genes (DPB genes) have been found up-regulated in cultured rice cells triggered with elicitors (chitin oligosaccharides). The genes *OsCPS2* and *OsKSL7*

are involved in the biosynthesis of phytocassanes, *OsCPS4* and *OsKSL4* in the biosynthesis of momilactones, and *OsKSL10* and *OsKSL8* in oryzalexin biosynthesis. Interestingly, several of these DPB genes are clustered in two regions on chromosome 4 (momilactones) and chromosome 2 (phytocassanes).

At 24 h hai a strong induction of the key biosynthetic genes localized in the two chromosome clusters (Figure 4A) was observed only in GV. *OsMASL*, *CYP76M8* and *CYP76M7*, which are DPB genes recently included in chromosome 2 and 4 clusters (Okada, 2011) but not yet included in diterpene phytoalexin GO groups, were also recovered as DEGs. Furthermore, the DPB gene *OsKSL8* (LOC\_Os11g28530; oryzalexin S synthesis) on chromosome 11 showed a basal level of gene expression (mock inoculated conditions) consistently higher in GV than in VN and, after blast infection, it was significantly up-regulated in the resistant genotype (4.5-fold induction) but not in the susceptible one (despite some induction trend observed in VN).

The ensemble of DPB genes is defined by GO terms GO:0051501 (diterpene phytoalexin metabolic process), GO:0051502 (diterpene phytoalexin biosynthesis) and GO:0051504 (diterpene phytoalexin precursor biosynthetic process pathway). A heatmap of this gene set in Figure 4B highlights the up-regulation of crucial genes belonging to the diterpene phytoalexin biosynthetic pathway in the resistant genotype GV. Expression values for differentially expressed DPB genes are reported in Table S2. A similar DPB gene induction, particularly of the clusters on chromosome 4 (momilactones) and chromosome 2 (phytocassanes), was recently observed in the comparison between two Near Isogenic Lines (NILs) differing for the *pi-i* blast resistance gene. In this work, diterpene gene clusters induction occurred at 2 dpi in the resistant NIL, while in the susceptible NIL it was only evident at 4 dpi [39]. After 4 dpi, the activation of the DPB genes was similar in both susceptible and resistant NILs, indicating that the timing of rice diterpene phytoalexins accumulation might be critical to the containment of the effect of blast infection and ultimately to determining differences between resistant and susceptible phenotypes [39].

In the GV-VN experimental system, most of the genes encoding enzymes of the momilactone biosynthetic pathway and the two known genes encoding enzymes of the phytocassanases pathway were significantly up-regulated only in the blast resistant genotype within 24 hpi. This early gene induction, even anticipated in comparison to what has been reported by Hasegawa et al. (2010) [39] (in which increased DPB gene expression in blast resistant plants was observed from 48 hpi onwards), support a crucial role of DPB genes in GV blast resistance. In addition, the up-regulation of the oryzalexin S biosynthetic gene (*OsKSL8*) in GV was at least two times higher than reported previously for a genotype bearing the *Pi-i* resistance gene at the same time point of inoculation [39], suggesting that the R gene(s) carried by GV may lead to the accumulation of a wider spectrum of diterpene phytoalexins (oryzalexin S, phytocassanes and momilactones).

It has previously been shown that, in rice cell culture, the bZIP transcription factor *OsTGAPI* (LOC\_Os04g54474), participates in diterpene phytoalexin gene cluster transcriptional induction showing an about 3-fold induction after elicitation with chitin oligosaccharides [40]. In our dataset, *OsTGAPI* was expressed in both GV and VN, but not listed among DEGs. Nevertheless,

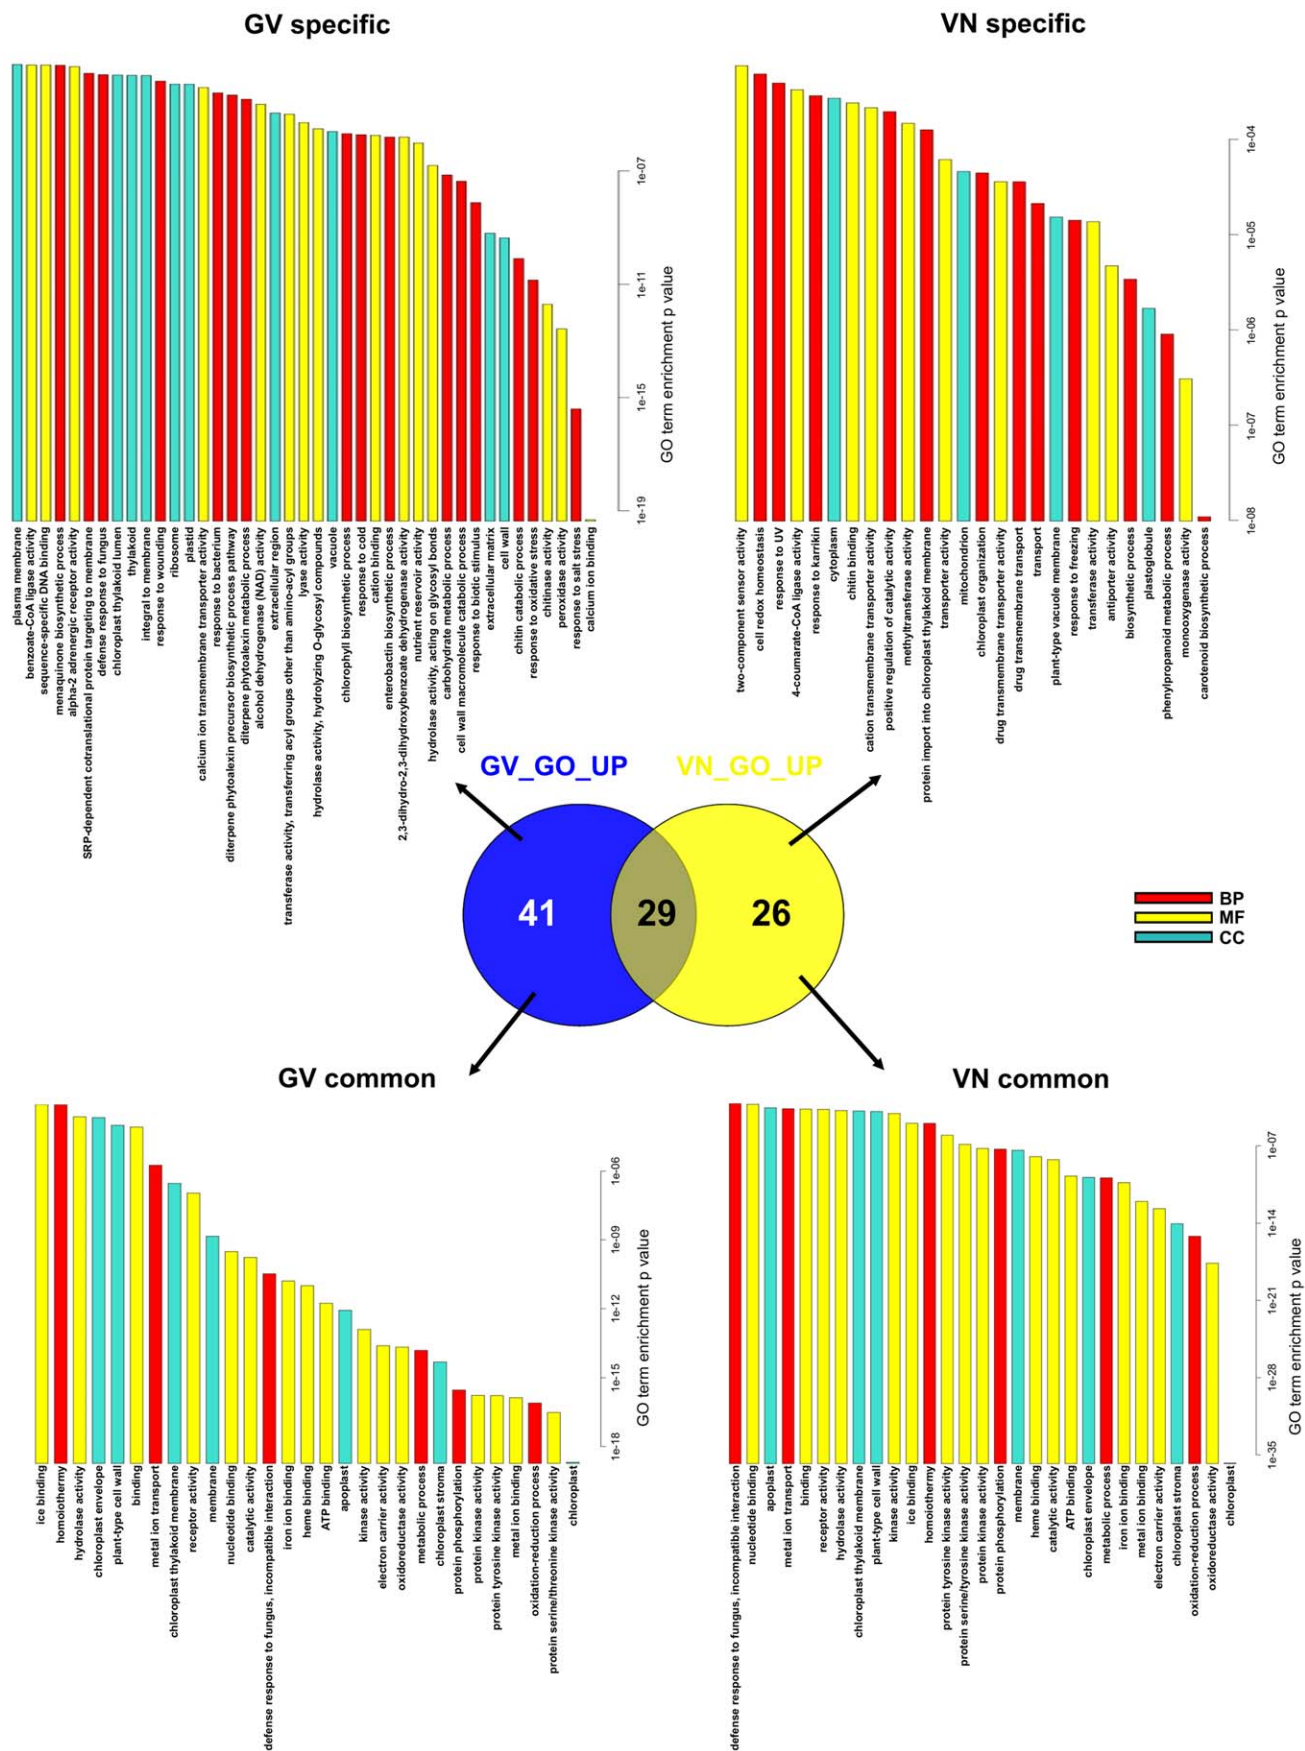

**Figure 3. GO enrichment in Gigante Vercelli (GV) and Vialone Nano (VN).** Common, GV-specific and VN-specific enriched GO terms as estimated by goseq at an FDR cutoff of 0.05. Enrichment p values are shown on X axis. Two bar plots are shown for the common enriched GO to detail the distinct p values for the varieties. BP (red): Biological Process; MF (yellow): Molecular Function; CC (turquoise): Cell Compartment. doi:10.1371/journal.pone.0051609.g003

beside *OsTGAPI*, additional regulatory mechanisms are required for DPB gene induction since the constitutive over-expression of *OsTGAPI* alone led to very low induction of DPB genes, and relevant expression was only attained by simultaneous elicitation of cultured cells with chitin oligosaccharide [40]. In this context, the WRKY transcription factors, previously indicated as involved in controlling phytoalexin genes expression [41,42], are promising candidates for co-regulators of DPB genes and may further contribute to GV-specific defence mechanisms.

### Differential Modulation of WRKY Gene Family Members

The WRKY transcription factors superfamily contains more than 100 members in rice [43] and the regulation of defence responses is among the various processes regulated by this transcription factor class [44]. Interestingly, GV underwent a massive induction of WRKY genes upon infection and the transcription of 18 differentially expressed *WRKY* genes was induced with fold changes ranging from 2 to 870 in response to blast infection. Conversely, VN exhibited minor trends of *WRKY* genes induction, with only 7 *WRKY*s among DEGs with fold change values ranging from 2 to 3, with one *WRKY* (*WRKY4*) transcriptionally down-regulated (Table 3). Hierarchical clustering of *WRKY* genes (Figure 5) gives an overview of the extent of *WRKY* induction in GV and highlights a major cluster (marked in orange in Figure 5) of *WRKY* genes strongly up-regulated in GV but weakly/not up-regulated in VN. Additionally, only three significantly induced *WRKY* genes were in common between GV and VN, in agreement with the large differences in the defence gene induction observed in the two genotypes. A full list of the *WRKY* (as determined by INTERPRO id: IPR003657; “DNA-binding WRKY”) expression values detected in both genotypes is reported in Table S3.

Previous microarray analyses showed induction of several *WRKY* genes as induced by *M. oryzae* and/or chitin oligosaccharide elicitors (e.g. *OsWRKY45*, *OsWRKY53*, *OsWRKY62*, *OsWRKY55* and *OsWRKY71*) and their over-expression was shown to confer enhanced resistance to blast infection [45–48]. In our experiments, these genes exhibited either a strong induction in GV and no or moderate induction in VN (as observed for *WRKY62* and *WRKY45*), or about 2-fold induction in GV and almost unchanged expression in VN (for *WRKY71* and *WRKY55*) (Table 3). *OsWRKY45* (LOC\_Os05g25770) was previously shown to be strongly induced in response to blast infection, salicylic acid and benzothiazole (BTH) treatments and its over-expression strongly enhanced rice resistance to *M. grisea* and *Xanthomonas oryzae* pv. *oryzae*, while *WRKY45* gene knockdown strongly impaired BTH-induced resistance [49]. In GV, two *WRKY45* genes were identified as DEGs: LOC\_Os05g25770 was 13-fold induced upon inoculation in GV (with a strong basal level of expression) and showing only 3.2 fold-induction in VN, while LOC\_Os03g21710 (*WRKY79* in CGSNL nomenclature; Table 3) was 27-fold induced in GV and not recovered as a DEG in VN. The constitutive over-expression of *OsWRKY45* (LOC\_Os05g25770) is associated with hydrogen peroxide accumulation [45]; an enhanced accumulation of ROS would be consistent with the observed GO terms “peroxidase activity” (GO:0004601) and “response to oxidative stress” (GO:0006979) enriched in GV but not VN. The up-regulation of *WRKY45* suggests a possible defence-related upsurge of ROS and the consequent need of

detoxification mechanism activation. *OsWRKY62*, known to determine suppression of some defence response (e.g. those induced during the *AVRxa21-Xa21* interaction, [50], was also strongly induced (34-fold) in GV only (Table 3), suggesting a fine tuning regulation of defence responses.

The involvement of *WRKY* genes in controlling phytoalexin genes expression is well established [41,42], and is supported by the presence of functional W-boxes, the binding sites of *WRKY* proteins, in the promoters of several DPB genes of the gene clusters on chromosomes 2, 4 and 11 [51]. The strong induction of *WRKY* genes in GV may therefore contribute to both the magnitude and promptness of DPB responses which is lacking in VN.

*WRKY* genes are also known to induce several pathogenesis-related genes [47,52] and this may account for the enrichment of the GO term “defence response to fungus” (GO:0050832) in GV. This GO term underlies the onset of more general fungal defence responses (e.g. activation flavin-containing mono-oxygenases, chitinases and glucanases) which was enriched in GV and not in VN.

The Cufflinks software was used to identify differential expression of alternative *WRKY* transcript isoforms. Thus, in addition to the *WRKY* genes described above, several modulated *WRKY* isoforms have been identified (Table S4) and, among them, some were associated with loci for which differential expression could not be detected at the whole-gene level. Two transcripts originating from the same transcription start site were identified for *OsWRKY62*, with both isoforms strongly induced by blast infection in GV and only one, the longest of the two isoforms, moderately induced despite being weakly expressed in VN. It was previously observed that the longest isoform contains a putative sumoylation site and a potential coiled-coil domain at the C-terminus and N-terminus respectively [50,53]. Overexpression of this isoform hampered *Xa21*-mediated resistance to *X. oryzae* pv. *oryzae* and suppressed the activation of defense-related genes, while the second isoform did not produce clear effects on *X. oryzae* pv. *oryzae* resistance, indicating that at least one *OsWRKY62* isoforms act as a negative regulator of innate immunity in rice [53]. The observed differential regulation of the *OsWRKY62* isoforms in GV might suggest a regulatory role of the longer also in rice interaction with blast. Similarly, for *OsWRKY65*, one of the most induced *WRKY* genes in GV (105-fold; Table 3), two transcripts of differing lengths, 1,443 and 1,026 bp, and different transcription start sites were identified. Both isoforms were induced in GV only with the longer representing a novel isoform (class code = j, Table S4) not included in existing annotations. Interestingly, for *OsWRKY40* (LOC\_Os11g02530, 13-fold induced in GV and not modulated in VN) three different isoforms with various transcription start sites were detected. In blast infected GV the canonical 3 exon-containing major predicted isoform (including *WRKY* domains) was transcribed, while in controls and VN infected samples only a form lacking two 5' exons was identified (Figure 6). Expression analysis with RT-PCR and quantitative RT-PCR using primers specific for exon 1 and exon 3 of *OsWRKY40* (Figure 6) confirmed that both exons were transcribed in GV challenged with blast while in GV mock-inoculated and VN (both infected and not infected samples) the transcription of the exon 3 only was observed (data not shown). As the WRKY domain is split among the two exons of the 3' region, in VN and control GV a protein bearing

**Table 2.** Differentially Expressed Genes in the common enriched GO term “defence response to fungus, incompatible interaction” (GO:0009817) in Gigante Vercelli and Vialone Nano.

| id             | MSU 6.12 description                                                                           | Gigante Vercelli             |                               |             |           | Vialone Nano      |                              |                   |                   |
|----------------|------------------------------------------------------------------------------------------------|------------------------------|-------------------------------|-------------|-----------|-------------------|------------------------------|-------------------|-------------------|
|                |                                                                                                | Mock inoculated <sup>a</sup> | Blast inoculated <sup>a</sup> | Fold change | FDR       | Listed among DEGs | Mock inoculated <sup>a</sup> | Blast inoculation | Listed among DEGs |
| LOC_Os01g51570 | glycosyl hydrolases family 17, putative, expressed                                             | 2927.53                      | 8100.54                       | 2.77        | 4.27E-004 | YES               | 336.86                       | 2883.61           | NO                |
| LOC_Os01g71340 | glycosyl hydrolases family 17, putative, expressed                                             | 5717.52                      | 15734.46                      | 2.75        | 3.33E-004 | YES               | 621.97                       | 5817.86           | NO                |
| LOC_Os01g71350 | glycosyl hydrolases family 17, putative, expressed                                             | 1369                         | 4236.71                       | 3.09        | 6.85E-005 | YES               | 12022                        | 1100.76           | NO                |
| LOC_Os01g71474 | glycosyl hydrolases family 17, putative, expressed                                             | 1529                         | 122.02                        | 7.98        | 4.83E-009 | YES               | 1.53                         | 1.37              | NO                |
| LOC_Os01g71670 | glycosyl hydrolases family 17, putative, expressed                                             | 240.41                       | 835.55                        | 3.48        | 0.02      | YES               | 1323.68                      | 5325.68           | NO                |
| LOC_Os01g71830 | glycosyl hydrolases family 17, putative, expressed                                             | 23.4                         | 436.62                        | 18.66       | 0.01      | YES               | 0.42                         | 2.54              | NO                |
| LOC_Os03g15050 | phosphoenolpyruvate carboxykinase, putative, expressed                                         | 3630.94                      | 7788.02                       | 2.14        | 0.04      | YES               | 5197.28                      | 7874.69           | NO                |
| LOC_Os03g45960 | thaumatin, putative, expressed                                                                 | 70.57                        | 867.08                        | 12.29       | 6.81E-006 | YES               | 51.75                        | 360.83            | YES               |
| LOC_Os03g46070 | thaumatin, putative, expressed                                                                 | 280.98                       | 3030.45                       | 10.79       | 6.37E-016 | YES               | 171.92                       | 1293.07           | NO                |
| LOC_Os03g46440 | BTBA4 - Bric-a-brac, Tramtrack, Broad Complex BTB domain with Ankyrin repeat region, expressed | 470.44                       | 1453.45                       | 3.09        | 2.98E-005 | YES               | 515.18                       | 812.6             | NO                |
| LOC_Os05g31140 | glycosyl hydrolases family 17, putative, expressed                                             | 6726.72                      | 4776.57                       | 0.71        | 0.89      | NO                | 2195.96                      | 7501.05           | 3.31E-008 YES     |
| LOC_Os06g14510 | glucose-6-phosphate isomerase, putative, expressed                                             | 342.82                       | 267.34                        | 0.78        | 0.91      | NO                | 1850.33                      | 906.93            | 2.19E-003 YES     |
| LOC_Os08g41730 | peptidase, T1 family, putative, expressed                                                      | 89.03                        | 109.77                        | 1.23        | 0.98      | NO                | 185.57                       | 489.98            | 0.01 YES          |
| LOC_Os11g37950 | WIP3 - Wound-induced protein precursor, expressed                                              | 54.82                        | 463.3                         | 8.45        | 5.97E-013 | YES               | 28.07                        | 404.86            | 0.01 YES          |
| LOC_Os11g37960 | WIP4 - Wound-induced protein precursor, expressed                                              | 185.27                       | 973.62                        | 5.26        | 7.97E-011 | YES               | 74.53                        | 548.98            | 0.11 NO           |
| LOC_Os11g37970 | WIP5 - Wound-induced protein precursor, expressed                                              | 166.97                       | 303.3                         | 1.82        | 0.62      | NO                | 489.97                       | 2095.05           | 0.02 YES          |
| LOC_Os12g43450 | thaumatin family domain containing protein, expressed                                          | 92.21                        | 400.73                        | 4.35        | 0.01      | YES               | 318.5                        | 2374.89           | 0.04 YES          |

<sup>a</sup>Expression values are reported as DESeq-normalized read counts.  
doi:10.1371/journal.pone.0051609.t002

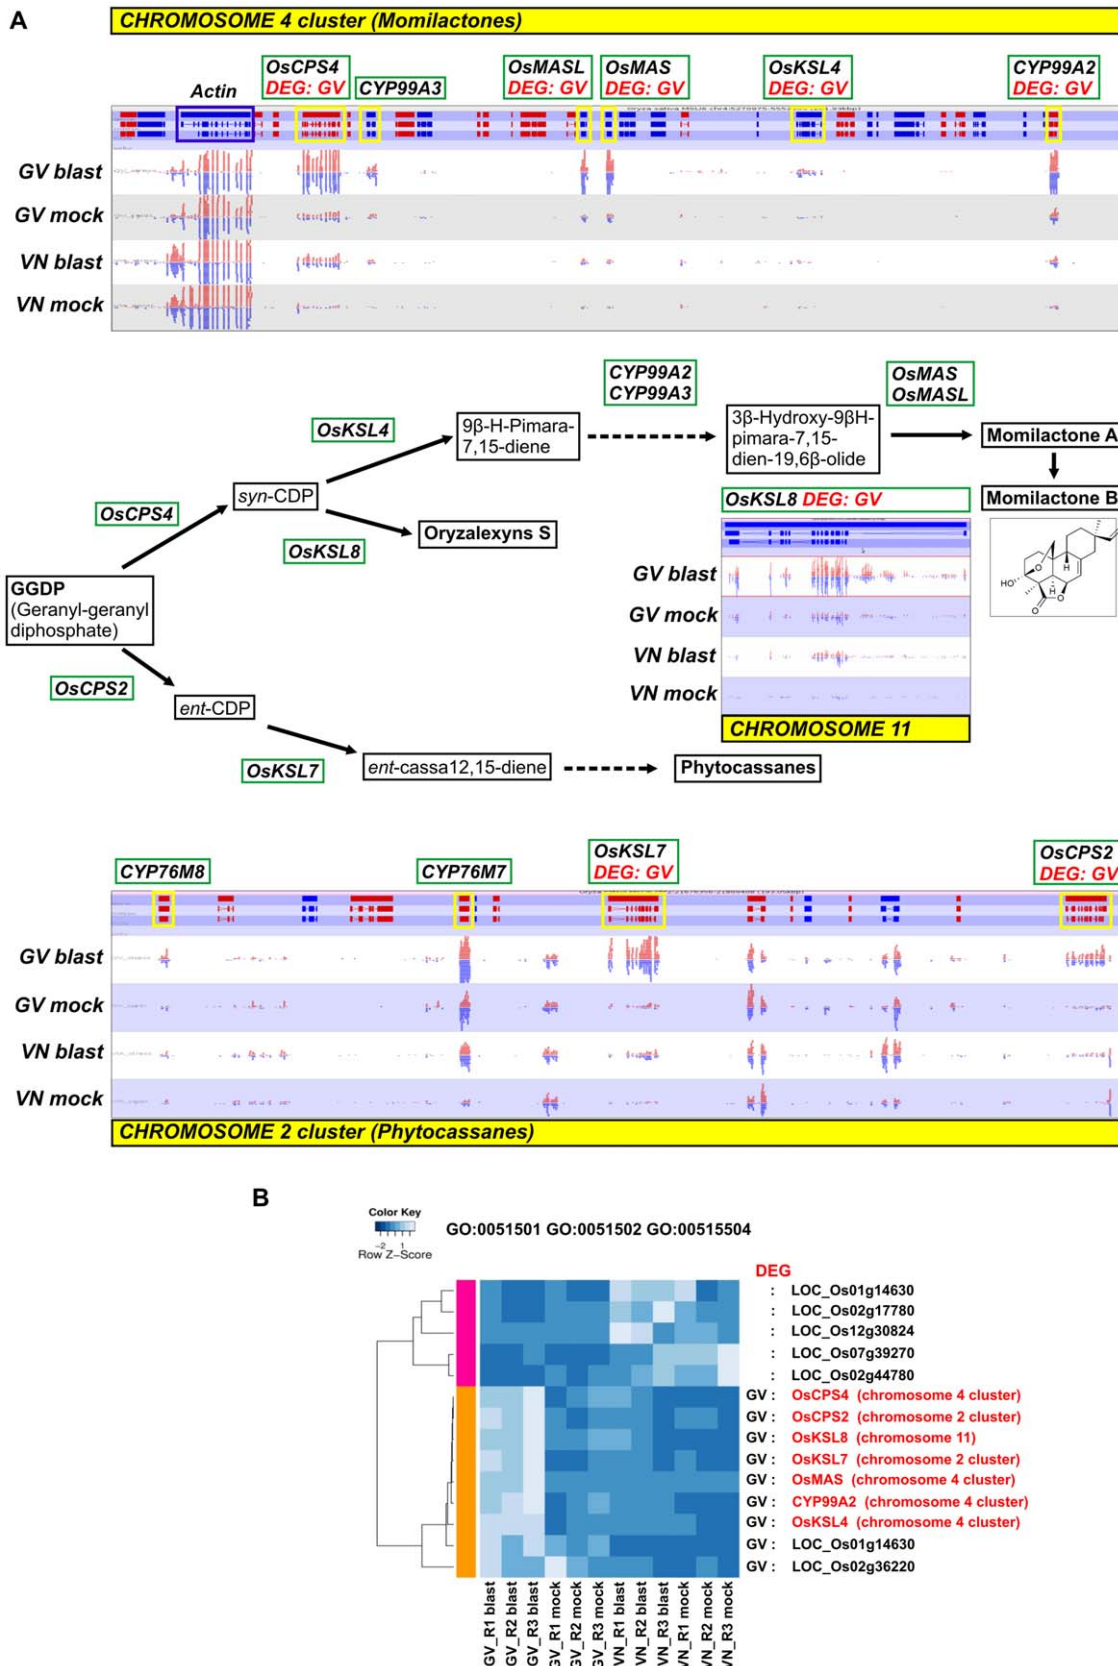

**Figure 4. Modulation of DPB genes in Gigante Vercelli (GV) and Vialone Nano (VN).** **A:** Diterpene phytoalexin gene clusters on the rice chromosome 4 (upper panel) and 2 (lower panel). Read mapping patterns of the *OsKSL8* gene on rice chromosome 11 are also reported. Genes called as DEGs are indicated below gene symbols and genes boxed in yellow in the panels representing gene, mRNA and coding sequence structures

(respectively from the upper to the lower bars) are known/candidate diterpene phytoalexin biosynthetic genes (*DPB* genes). Reads from the 3 biological replicates for each genotype and treatment were merged and visualized with Seqmonk software. Red and blue segments above and below the midlines represent reads mapping to forward and reverse strands, respectively. The actin gene flanking the chromosome 4 cluster (boxed in blue) is shown as an internal control. In the middle panel, genes involved in the diterpene phytoalexin biosynthetic pathways are boxed in green and compounds in black. **B:** Hierarchical clustering of *DPB* genes based on their expression values. The reported *DPB* genes are those listed (MSU release 6.12) to GO terms GO:0051501 (diterpene phytoalexin metabolic process), GO:0051502 (diterpene phytoalexin biosynthesis) and GO:0051504 (diterpene phytoalexin precursor biosynthetic process pathway) in the different GV and VN treatments (blast or mock inoculated) and biological replicates (R1, R2, R3). The colour scale indicates the expression value (light blue indicate higher expression value, darker blue indicates lower gene expression values). The names of the genes in common with panel A are highlighted in red. Genes called as DEGs and their chromosome cluster location are indicated on the right border of the heatmap. Colored bars on the left of the heatmap mark distinct major branches in the clustering tree grouping genes with similar expression pattern.  
doi:10.1371/journal.pone.0051609.g004

a truncated WRKY domain is likely expressed. A very similar exon organization and read mapping pattern was found also in *WRKY64* (LOC\_Os12g02450, 8-fold induced in GV). In conclusion, our results highlighted that *WRKY* isoforms represent an additional strategy exploited by the blast resistant genotype GV for the fine tuning of resistance responses to blast infection.

### Blast-modulated Components of the Defence Signal Transduction Pathways

**WAK kinases.** Wall Associated Kinases (WAK kinases) are cell wall-associated receptor kinases and represent a novel sub-family of plant Receptor-like kinases [54]. In MSU6.12, 130 genes are tagged with the keyword “*OsWAK*”. *WAK* genes present an extracellular epidermal growth factor-like domain and a putative intracellular serine/threonine kinase domain. Several WAKs bear a calcium-binding domain and their up-regulation in GV contributed to the enrichment of the GO term “calcium ion binding” (GO:0005509). In Arabidopsis, *WAKs* are involved in cell expansion, pathogen resistance and heavy metal stress tolerance [55], while AtWAK1 potentially acts as a receptor of oligogalacturonides elicitors [56]. WAKs link the plasma membrane to the cell wall matrix through their extracellular receptor domain, and can link perception of external signals (including pathogen attacks) to the triggering of defence mechanisms *via* their cytoplasmic kinase domains [57]. In GV, 15 *WAKs* were listed among DEGs and were all up-regulated with fold changes ranging from 2 to 30 (Table 4), while in VN only 4 *WAKs* were up-regulated and 4 down-regulated. A snapshot of the expression pattern of all rice *WAKs* highlights that 15 out of the 95 *OsWAK* genes expressed in our dataset were significantly induced by blast infection in GV and only one modulated gene was in common between susceptible and resistant genotypes (Figure 7). Despite being a very large group, rice *WAK* gene functions are poorly characterized. *OsWAK1* has recently been shown to be induced in response to blast infection and its over-expression conferred enhanced resistance to the fungus [58]. In our dataset, *OsWAK1* was strongly constitutively expressed in both GV and VN and although a slight up-regulation (1.9-fold) was observed in GV alone, this modulation was not statistically significant (Table S1). Nevertheless, several up-regulated *WAKs* clustered with *OsWAK1* in the heatmap (orange cluster in Figure 7); this observation, together with a role in blast resistance for a member of this receptor-like kinase group, could indicate a direct role in GV blast resistance for additional WAK proteins.

**Chitin elicitor sensing components.** The earliest characterized in blast sensing involve the binding of chitin oligosaccharides by CEBiP (chitin elicitor binding protein; LOC\_Os03g04110) and a chitin elicitor receptor kinase, OsCERK1 (LOC\_Os08g42580, a LysM receptor-like kinase). Upon chitin elicitor binding, CEBiP forms hetero-oligomers with OsCERK1 which, in turn, possibly through transphosphorylation, triggers downstream signalling [59,60]. Strikingly, *OsCERK1* knockdown lines exhibited

both a strongly depressed ROS upsurge and accumulation of phytocassanes and momilactones when challenged with elicitors. However, *OsCERK1* knockdown cell lines did not completely abolish elicitor responses, raising the possibility that other *OsLysM-RLKs* may play a sensing role [60]. In our dataset, both *CEBiP* and *OsCERK1* were strongly expressed in GV and VN with a moderate induction upon infection, while additional *OsLysM-RLK* genes were induced in GV (Table 5). Notably, *OsLYK4* was strongly constitutively transcribed (at levels higher than *OsCERK1*) and 2.34-fold induced in GV, despite not being included in DEGs. Two receptors not identified in previous studies, *OsLYK2* and *OsLysM-RLK7*, were up-regulated and listed among DEGs in GV but not in VN. These *OsLysM-RLKs* may contribute part of the GV-specific resistance responses and could represent the previously unidentified (or GV-specifically induced) *OsLysM-RLKs* responsible for the residual chitin sensing in *OsCERK1* knockdown cell lines. The expression values of additional, less-characterized LYS-M domain containing genes are listed in Table S5 (IPR018392; Peptidoglycan-binding lysin domain).

**MAP kinases.** Mitogen-activated protein kinase (MAPK) cascades represent candidates for downstream signalling processes, as they exert similar roles in a variety of signalling contexts downstream of receptor kinases, including the biosynthesis of the phytoalexin camalexin in Arabidopsis [34]. MAPK cascades consist of evolutionarily conserved kinase signaling modules involving at least three kinases: a MAPK, a MAPK kinase (MAPKK) and a MAPKK kinase (MAPKKK) [61]. Recently, a MAPK cascade involving the MAPKK OsMKK4 and the MAPKs OsMPK3 and OsMPK6 was shown to transduce chitin elicitor signal in rice to defense responses including biosynthesis of diterpenoid phytoalexins [62]. In partial agreement with these results, in our dataset the *OsMPK3* gene was significantly induced in GV (listed as DEG with a 2.35 fold change), while *OsMKK4*, despite the strong constitutive expression in GV, was listed as a DEG only in VN (Table S6). Finally, a strong constitutive expression and a slight but not significant induction of *OsMPK6* was observed in both rice genotypes (Table S6).

Despite recent advances in our understanding of this MAPK cascade, much less is known of the upstream MAPKKK (MAP3K) which actually trigger the cascade [44]. *MAP3K.18* and *MAP3K.19* (LOC\_Os05g46750 and LOC\_Os05g46760, respectively) were up-regulated and called as DEGs in GV only (Table S6). Interestingly, several rice microarray experiments indicate that these *MAP3Ks* should be upstream of the *MAPK* and *MAPKK* genes in different developmental stages and in response to various biotic and abiotic stresses [63]. Transcriptional induction of *MAP3K* in GV could therefore drive the activation of several downstream *MAPKKs*, whose genes are not modulated transcriptionally level by the infection process.

Finally, isoform analysis (Table S7) revealed that further *MAP3Ks* not significantly modulated at transcript level were however modulated at the levels of alternative splicing/alternative

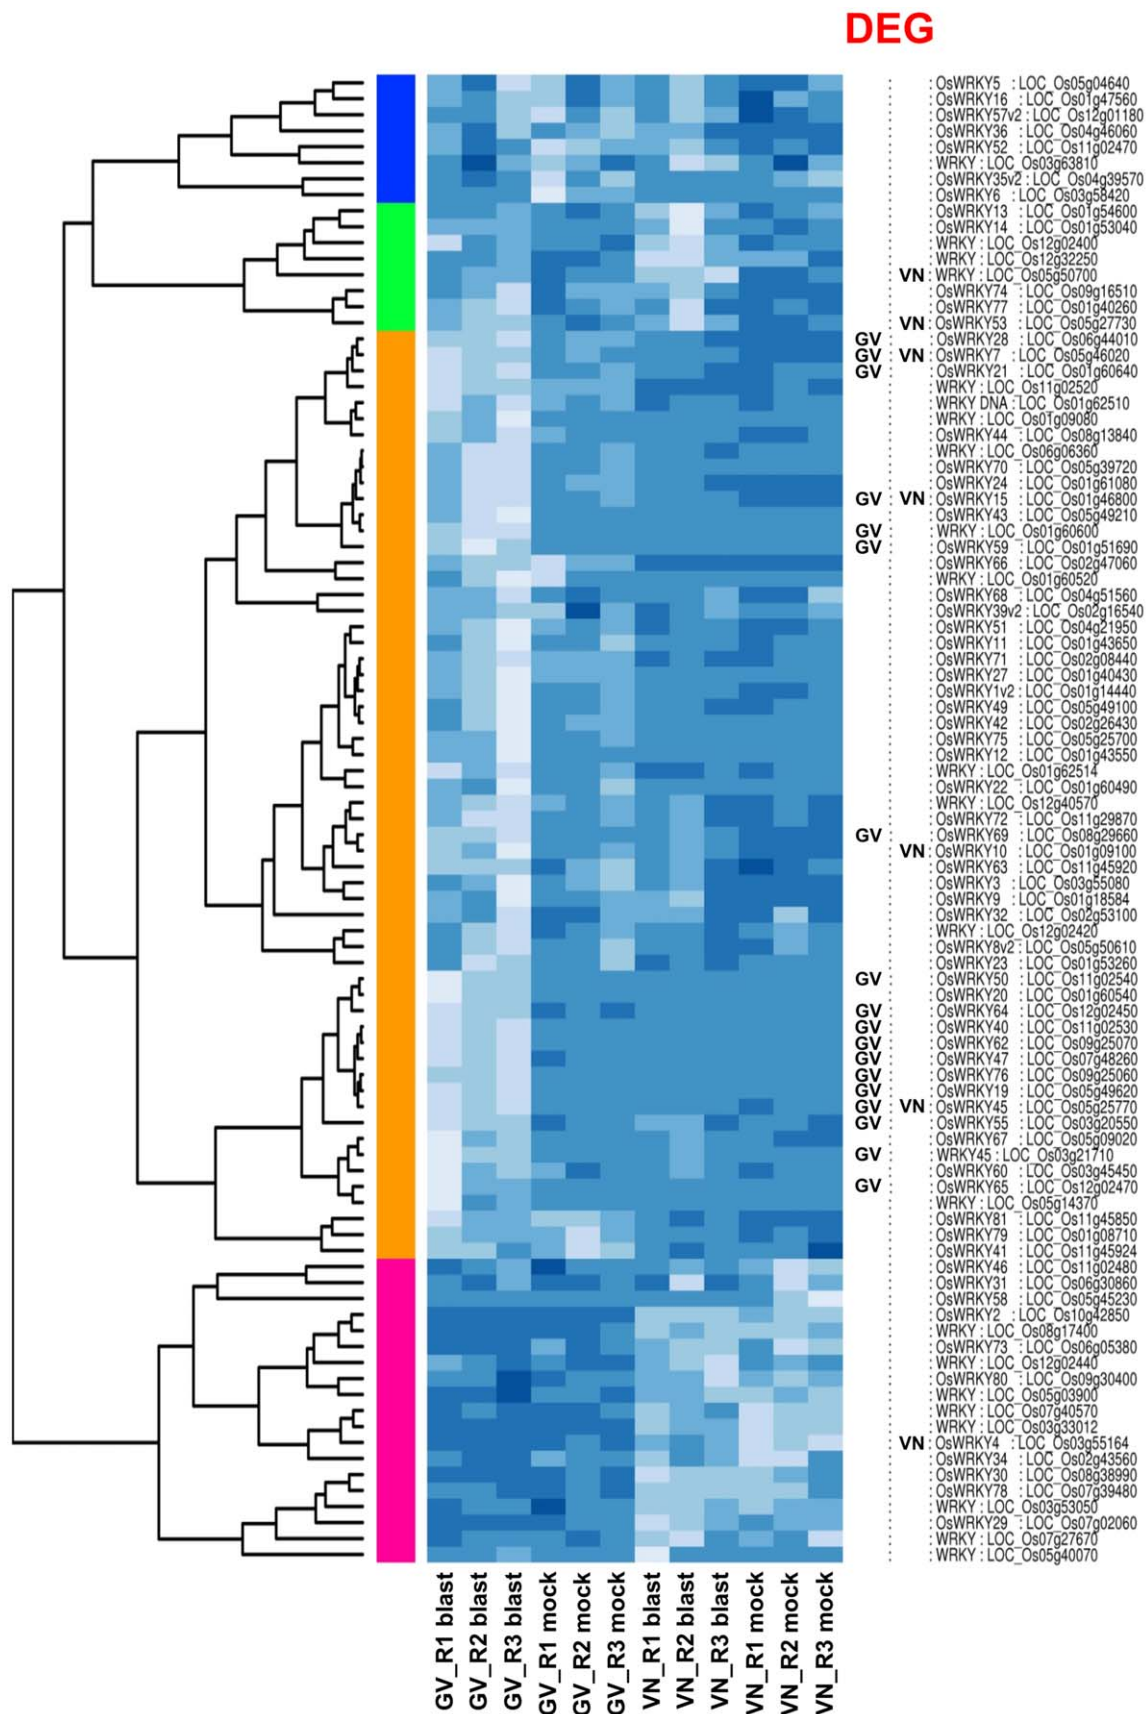

**Figure 5. Clustering and heatmap of *WRKY* gene expression.** Gigante Vercelli (GV) and Vialone Nano (VN) *WRKY* gene expression as affected by blast infection in the different treatments (blast or mock inoculated) and biological replicates (R1, R2, R3). Genes called as DEGs are indicated on

the right. Colored bars on the left of the heatmap mark distinct major branches in the clustering tree grouping genes with similar expression pattern. The colour scale indicates the expression value (light blue indicate higher expression value, darker blue indicates lower gene expression values). The heat map was generated with custom scripts based on heatmap.2 function as available in the 'gplots' Bioconductor package. doi:10.1371/journal.pone.0051609.g005

transcripts in GV but not in VN. The *MAP3K3* (LOC\_Os11g10100) is predicted to produce 4 and 6 isoforms in GV and VN, respectively. One of the 4 GV isoforms (00016381) was up-regulated in GV only (fold change 8.54, FDR 0.03), while none of the 6 VN isoforms was modulated upon infection (Figure 8A–C). Similarly, also *MAP3K1* (LOC\_Os04g56530) was predicted to produce an up-regulated (fold change 5.95; FDR 0.000) isoform in GV only (Figure 8D–F). Once again, as pointed out for *WRKY* gene expression analyses, RNA-Seq approach allowed to highlight the additional level of gene expression regulation represented by the blast infection-dependent modulation of different transcript isoforms.

### Transcriptional Activation of Downstream Defence Genes

The GV-specific enrichment of the GO term “defence response to fungus” (GO:0050832), reflects induction of additional defence genes in GV including the two chitinase genes *CHIT17* and *CHIT7* (LOC\_Os05g33130 and LOC\_Os06g51050; Chitinase family protein precursor) showing 37- and 8-fold induction, respectively (Table 6). Both, *CHIT17* and *CHIT7*, are class I chitinases with glycosyl hydrolase family 19 (GH19) catalytic domains and chitin binding domains [64]. Class I vacuolar chitinases are reputed to exert effective defence roles against fungi and to participate in the plant-pathogen co-evolution process; the high ratios of non-synonymous to synonymous substitutions rates in the coding regions indicating positively selected amino acid replacements [64,65]. Furthermore, significant and simultaneous up-regulation of six of the nine endo- $\beta$ -1,3-glucanases (glycosyl hydrolases family 17, hereafter GH17; Table 2) listed in GO group “defence response to fungus, incompatible interaction” (GO:0009817) was observed, while only non-significant, weak induction trends were observed in VN. Notably, five of the six GV up-regulated GH17 genes are clustered within a 350 kbp region on chromosome 1 (Figure 9). Similarly to GH19 chitinases described above, *GH17* genes appear to be subjected to rapid evolution as shown by the observed high rate of non-synonymous substitutions [66]. In addition to the direct protective role in fungal cell wall degradation exerted in combination with chitinases, one or more *GH17* gene members may contribute to elicitors generation by oligosaccharide production [67].

Other genes belonging to GO group 0050832 and up-regulated in GV only (Table 6) include a flavin-containing monooxygenase (LOC\_Os03g08410) which was strongly induced (47-fold) in GV (below expression threshold in VN), a further flavin-containing monooxygenase (LOC\_Os04g14690) that was 3.9-fold induced in GV and several other monooxygenase genes showing induction in GV despite not reaching an FDR <0.05 (Table S1).

### Time Course Analysis and Validation of Selected DEGs

Gene expression changes for six selected genes identified as DEGs during the RNA-Seq experiments were monitored at three inoculation time points (12, 24 and 48 hai) by means of quantitative real-time PCR (qRT-PCR). In GV, transcript levels of *OsWRKY50* and flavin-containing monooxygenase showed a steady increase in response to blast inoculation with fold changes values of about 20 already at 12 hai (Figure 10A). Blast responsiveness of the other four genes (*OsWRKY40*, *GH17*, *OsWAK23* and *CHIT17*) was characterized by a similar trend of transcripts accumulation, with an increased expression from 12 to

24 hai followed by a decrease at 48 hai. At this last time point, with the exclusion of *GH17*, the gene expression in the inoculated samples was however higher than the correspondent mock inoculated counterpart, with fold changes values ranging from about 3 (*OsWAK23*) to about 40 (*CHIT17*). In VN, with the exception of *OsWAK23*, for which a blast responsiveness was detected at 48 hai, no significant induction was observed in the qRT-PCR experiments for the tested genes.

The time course experiment clearly support the choice of the sample at 24 hai as the most suitable for an extensive transcriptomic analysis, furthermore the comparison between RNA-Seq and qRT-PCR fold changes data at 24 hai revealed a substantial agreement in the extent of the blast-induced variations for transcripts accumulation in the six tested genes (Figure 10B).

### Expression Analysis of Putative Disease Resistance Genes

Identification of blast resistance (*R*) genes is a key objective in rice breeding and more than 80 genes encoding resistance to various combinations of blast races are known [68,9]. To date, 13 major blast *R* genes have been cloned, 12 of which belong to the large NB-LRR gene family of disease resistance genes [10]. To pinpoint genes candidates for GV durable blast resistance, a similarity search for genes showing homology to known *R* genes was conducted on our dataset. Despite the fact that transcriptional modulation is not required for a *R* gene to be considered a candidate *R* gene (transcription of most *R* genes is not responsive to pathogen infection; [69]), a moderate level of pathogen responsiveness in terms of gene transcription (e.g. 30% induction over controls) has been reported for several active *R* genes (e.g. *Xa1*, *Xa27*; [70]). Such responsiveness was higher in the case of the blast resistance *Pib* gene [71] and the expression of some *R* genes may be detectable only upon pathogen challenge [69]. Based on the above criteria, bioMart queries (MSU release 6.12) were used to retrieve all Nipponbare genes tagged by the INTERPRO domain IPR000767 (“disease resistance protein”). The entire list (521 genes identified in GV and VN) is reported in Table S8 with accompanying expression values (DESeq normalized expression values) or not assigned values (NA in case of genes with RPKM <0.1). In a few cases where the reported MSU 6.12 gene descriptions for the IPR000767 “disease resistance proteins” did not support a putative disease resistance role, due to different database annotation procedures, we added in parentheses an alternative description of the best blast hit supporting such a putative role (Table S8). In order to identify resistance gene analogs (RGAs) candidate for the GV resistance, the list of 521 genes was filtered according to the following criteria: a) transcriptional induction by the blast pathogen in GV only (i.e. GV-specific induced RGA genes called as DEGs); b) genes expressed in GV only (i.e. expressed in GV, not expressed in VN, regardless of infection responsiveness); and c) expression ratio among infected GV and infected VN of at least two, regardless of infection responsiveness (Table S9; redundancies with previous entries were removed). A total of 75 candidate RGAs (8, 32 and 35 according to the a), b) or c) above mentioned criteria, respectively) were localized on the 12 rice chromosomes (Figure 11A). The analysis of possible co-localization between the position in the Nipponbare genome of alleles or loci of

**Table 3.** Differentially expressed *WRKY* genes in Gigante Vercelli and Vialone Nano.

| <b>Gigante Vercelli</b> |                                                                                                                            |                                    |                                     |                    |            |
|-------------------------|----------------------------------------------------------------------------------------------------------------------------|------------------------------------|-------------------------------------|--------------------|------------|
| <b>id</b>               | <b>MSU 6.12 description</b>                                                                                                | <b>Mock inoculated<sup>a</sup></b> | <b>Blast inoculated<sup>a</sup></b> | <b>Fold change</b> | <b>FDR</b> |
| LOC_Os11g02540          | <i>OsWRKY50</i> - Superfamily of TFs having WRKY and zinc finger domains, expressed                                        | 0.27                               | 233.70                              | 872.05             | 2.34E–011  |
| LOC_Os12g02470          | <i>OsWRKY65</i> - Superfamily of TFs having WRKY and zinc finger domains, expressed                                        | 0.49                               | 51.46                               | 105.06             | 0.030      |
| LOC_Os09g25070          | <i>OsWRKY62</i> - Superfamily of TFs having WRKY and zinc finger domains, expressed                                        | 35.40                              | 1206.28                             | 34.07              | 2.86E–018  |
| LOC_Os03g21710          | <i>OsWRKY45</i> transcription factor, putative, expressed (WRKY79, according CGSNL nomenclature)                           | 10.88                              | 294.70                              | 27.09              | 4.76E–008  |
| LOC_Os09g25060          | <i>OsWRKY76</i> - Superfamily of TFs having WRKY and zinc finger domains, expressed                                        | 80.63                              | 1257.31                             | 15.59              | 1.21E–012  |
| LOC_Os05g49620          | <i>OsWRKY19</i> - Superfamily of TFs having WRKY and zinc finger domains, expressed                                        | 20.64                              | 285.22                              | 13.82              | 3.90E–016  |
| LOC_Os11g02530          | <i>OsWRKY40</i> - Superfamily of TFs having WRKY and zinc finger domains, expressed                                        | 30.16                              | 406.26                              | 13.47              | 2.90E–019  |
| LOC_Os05g25770          | <i>OsWRKY45</i> - Superfamily of TFs having WRKY and zinc finger domains, expressed                                        | 250.41                             | 3273.84                             | 13.07              | 7.95E–016  |
| LOC_Os07g48260          | <i>OsWRKY47</i> - Superfamily of TFs having WRKY and zinc finger domains, expressed                                        | 85.19                              | 787.49                              | 9.24               | 4.29E–016  |
| LOC_Os12g02450          | <i>OsWRKY64</i> - Superfamily of TFs having WRKY and zinc finger domains                                                   | 11.43                              | 95.39                               | 8.35               | 1.21E–007  |
| LOC_Os01g60600          | WRKY DNA-binding domain containing protein, expressed (WRKY108, according CGSNL nomenclature)                              | 58.65                              | 447.79                              | 7.64               | 1.14E–005  |
| LOC_Os01g51690          | <i>OsWRKY59</i> - Superfamily of TFs having WRKY and zinc finger domains, expressed (WRKY26, according CGSNL nomenclature) | 13.08                              | 90.19                               | 6.89               | 0.010      |
| LOC_Os01g60640          | <i>OsWRKY21</i> - Superfamily of TFs having WRKY and zinc finger domains, expressed                                        | 58.66                              | 196.46                              | 3.35               | 2.11E–004  |
| LOC_Os05g46020          | <i>OsWRKY7</i> - Superfamily of TFs having WRKY and zinc finger domains, expressed                                         | 592.03                             | 1587.33                             | 2.68               | 2.44E–003  |
| LOC_Os06g44010          | <i>OsWRKY28</i> - Superfamily of TFs having WRKY and zinc finger domains, expressed                                        | 316.64                             | 836.89                              | 2.64               | 3.03E–003  |
| LOC_Os03g20550          | <i>OsWRKY55</i> - Superfamily of TFs having WRKY and zinc finger domains, expressed                                        | 62.90                              | 157.28                              | 2.5                | 0.030      |
| LOC_Os08g29660          | <i>OsWRKY69</i> - Superfamily of TFs having WRKY and zinc finger domains, expressed                                        | 138.01                             | 329.11                              | 2.39               | 0.020      |
| LOC_Os01g46800          | <i>OsWRKY15</i> - Superfamily of TFs having WRKY and zinc finger domains, expressed                                        | 261.45                             | 555.41                              | 2.12               | 0.040      |
| <b>Vialone Nano</b>     |                                                                                                                            |                                    |                                     |                    |            |
| <b>id</b>               | <b>MSU 6.12 description</b>                                                                                                | <b>Mock inoculated<sup>a</sup></b> | <b>Blast inoculated<sup>a</sup></b> | <b>Fold Change</b> | <b>FDR</b> |
| LOC_Os05g25770          | <i>OsWRKY45</i> - Superfamily of TFs having WRKY and zinc finger domains, expressed                                        | 248.42                             | 818.37                              | 3.29               | 0.04       |
| LOC_Os05g50700          | WRKY DNA-binding domain containing protein, expressed (WRKY111, according CGSNL nomenclature)                              | 18.88                              | 62.13                               | 3.29               | 0.02       |
| LOC_Os01g09100          | <i>OsWRKY10</i> - Superfamily of TFs having WRKY and zinc finger domains, expressed                                        | 15.11                              | 47.82                               | 3.16               | 0.04       |
| LOC_Os01g46800          | <i>OsWRKY15</i> - Superfamily of TFs having WRKY and zinc finger domains, expressed                                        | 61.35                              | 173.04                              | 2.82               | 0.04       |
| LOC_Os05g46020          | <i>OsWRKY7</i> - Superfamily of TFs having WRKY and zinc finger domains, expressed                                         | 89.85                              | 207.62                              | 2.31               | 0.02       |
| LOC_Os05g27730          | <i>OsWRKY53</i> - Superfamily of TFs having WRKY and zinc finger domains, expressed                                        | 2452.43                            | 5026.15                             | 2.05               | 4.47E–003  |
| LOC_Os03g55164          | <i>OsWRKY4</i> - Superfamily of TFs having WRKY and zinc finger domains                                                    | 1263.96                            | 599.07                              | 0.47               | 0.01       |

<sup>a</sup>Expression values are reported as DESeq-normalized read counts.  
doi:10.1371/journal.pone.0051609.t003

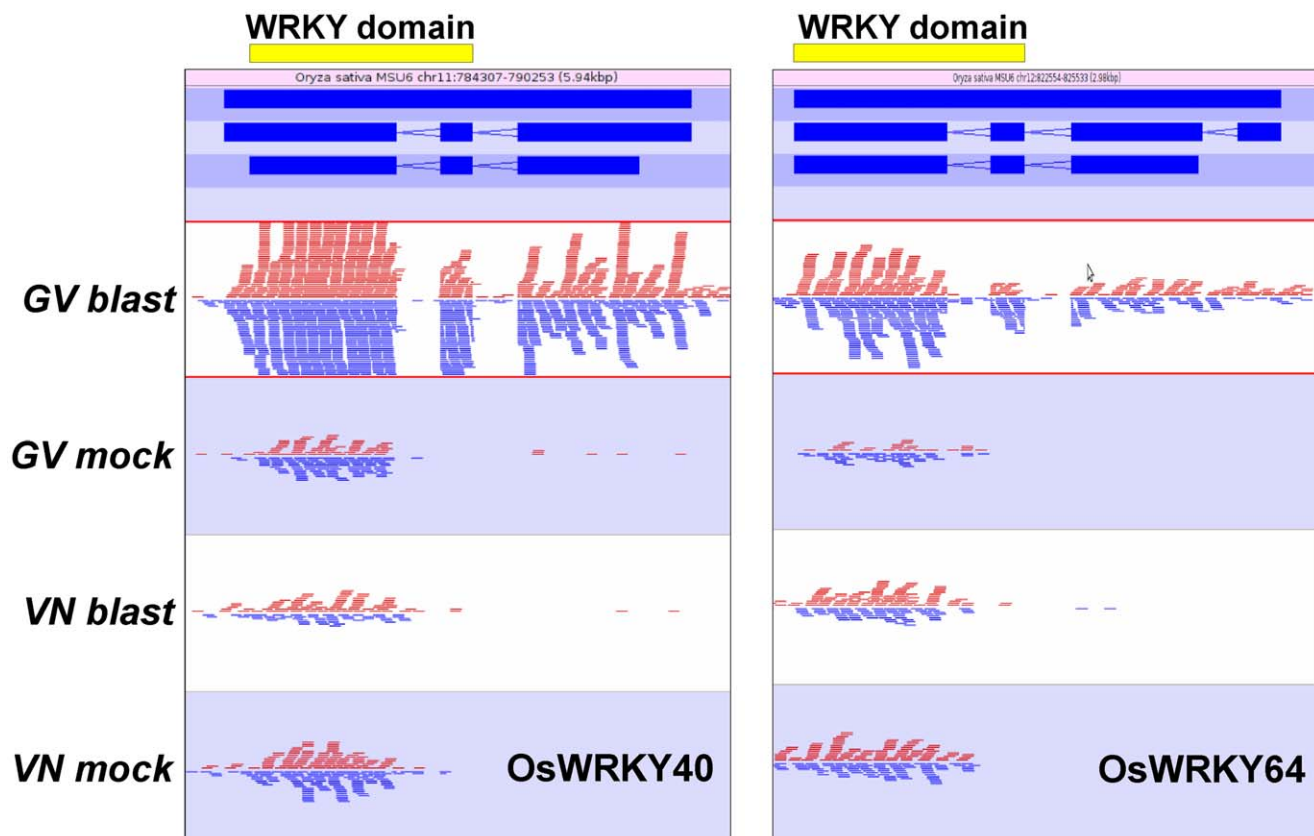

**Figure 6. Reads mapping pattern for *OsWRKY40* and *OsWRKY64*.** Expression patterns for Gigante Vercelli (GV) and Vialone Nano (VN) in mock and blast inoculation conditions are reported. Red and blue segments above and below the midline represent reads mapping to forward and reverse strands, respectively. Localizations of exons coding for the WRKY domain are indicated with yellow bars in the upper panels. Blue bars in the second panel represent gene, mRNA and coding sequence structure respectively from the upper to the lower bar.

doi:10.1371/journal.pone.0051609.g006

known blast resistance genes (e.g. *Pit*, *Pib*, *Pi21*, *Pid3*, *Pi-zt*, *Pi-5*, *Pi-km*, *Pi-ta*) and the identified 75 RGAs candidates highlighted proximity relationships on rice chromosome 4 between an RGA expressed in GV only (LOC\_Os04g32940) and the *pi21* gene (LOC\_Os04g32850; [17]) underlying a blast resistance QTL and on chromosome 11 between a cluster of differentially expressed RGAs and the *Pi-km1/2* blast resistance locus (Figure 11A). Read mapping patterns for selected genes belonging to the three classes of candidate RGAs (significantly up-regulated only in GV, expressed in GV only and induced more than two times in GV) is reported in Figure 11B. A detailed analysis of the results highlights that, for some RGAs (LOC\_Os11g45790; LOC\_Os11g11990), expression in VN is abolished or reduced by blast infection while no differences or some up-regulation were observed for GV (Figure 11B). This result supports a possible suppression of defence responses by pathogen effectors in the susceptible genotype, an observation that is in agreement with previous reports in which fungal pathogens secrete protein effectors capable of suppressing resistance gene-based and basal defence responses in compatible interactions [72–75].

The 75 RGAs identified represent possible candidate genes for GV blast resistance. The comparison of their map positions with those of the genetic loci explaining GV resistance (mapping work currently in progress) will both allow identification of co-positional relationships between candidates RGAs with resistance loci and

considerably restrict the number of candidates assisting in the identification of the genuine GV resistance gene(s).

#### Co-regulation Analysis of GV Blast-modulated Genes

Co-regulation analysis of a sub-set of GV DEGs for which a detailed dissection was conducted in the present study, accounting for a total of 63 genes (Table S10), was carried out by calculating the pairwise Pearson correlation using the Rice Expression Matrix (REM) and RI-REG software [76]. The REM was based on Affymetrix GeneChip® Rice Genome Array data including all publicly available Affymetrix experiments in a large range of conditions (see Materials and Methods section) and RI-REG was applied to verify whether genes listed as DEGs in this study were effectively modulated, and eventually co-regulated, also when data were obtained with a different expression profiling technology. We observed that 55 out of the tested 63 genes were present in a large network, confirming our findings obtained by RNA-Seq analysis (Figure 12). In addition, in this large network at least half of the genes were linked with multiple connections suggesting tight relationships between the GV blast-infection-related DEGs. In particular, one big and four small sub-networks were identified, representing clusters of genes which might have specific functions in cooperating together, in agreement with a putative coordinated role of these genes in GV resistance responses. The big sub-network A included genes belonging to all defence pathways identified in the present work and activated during GV resistance response to blast. In this sub-network are

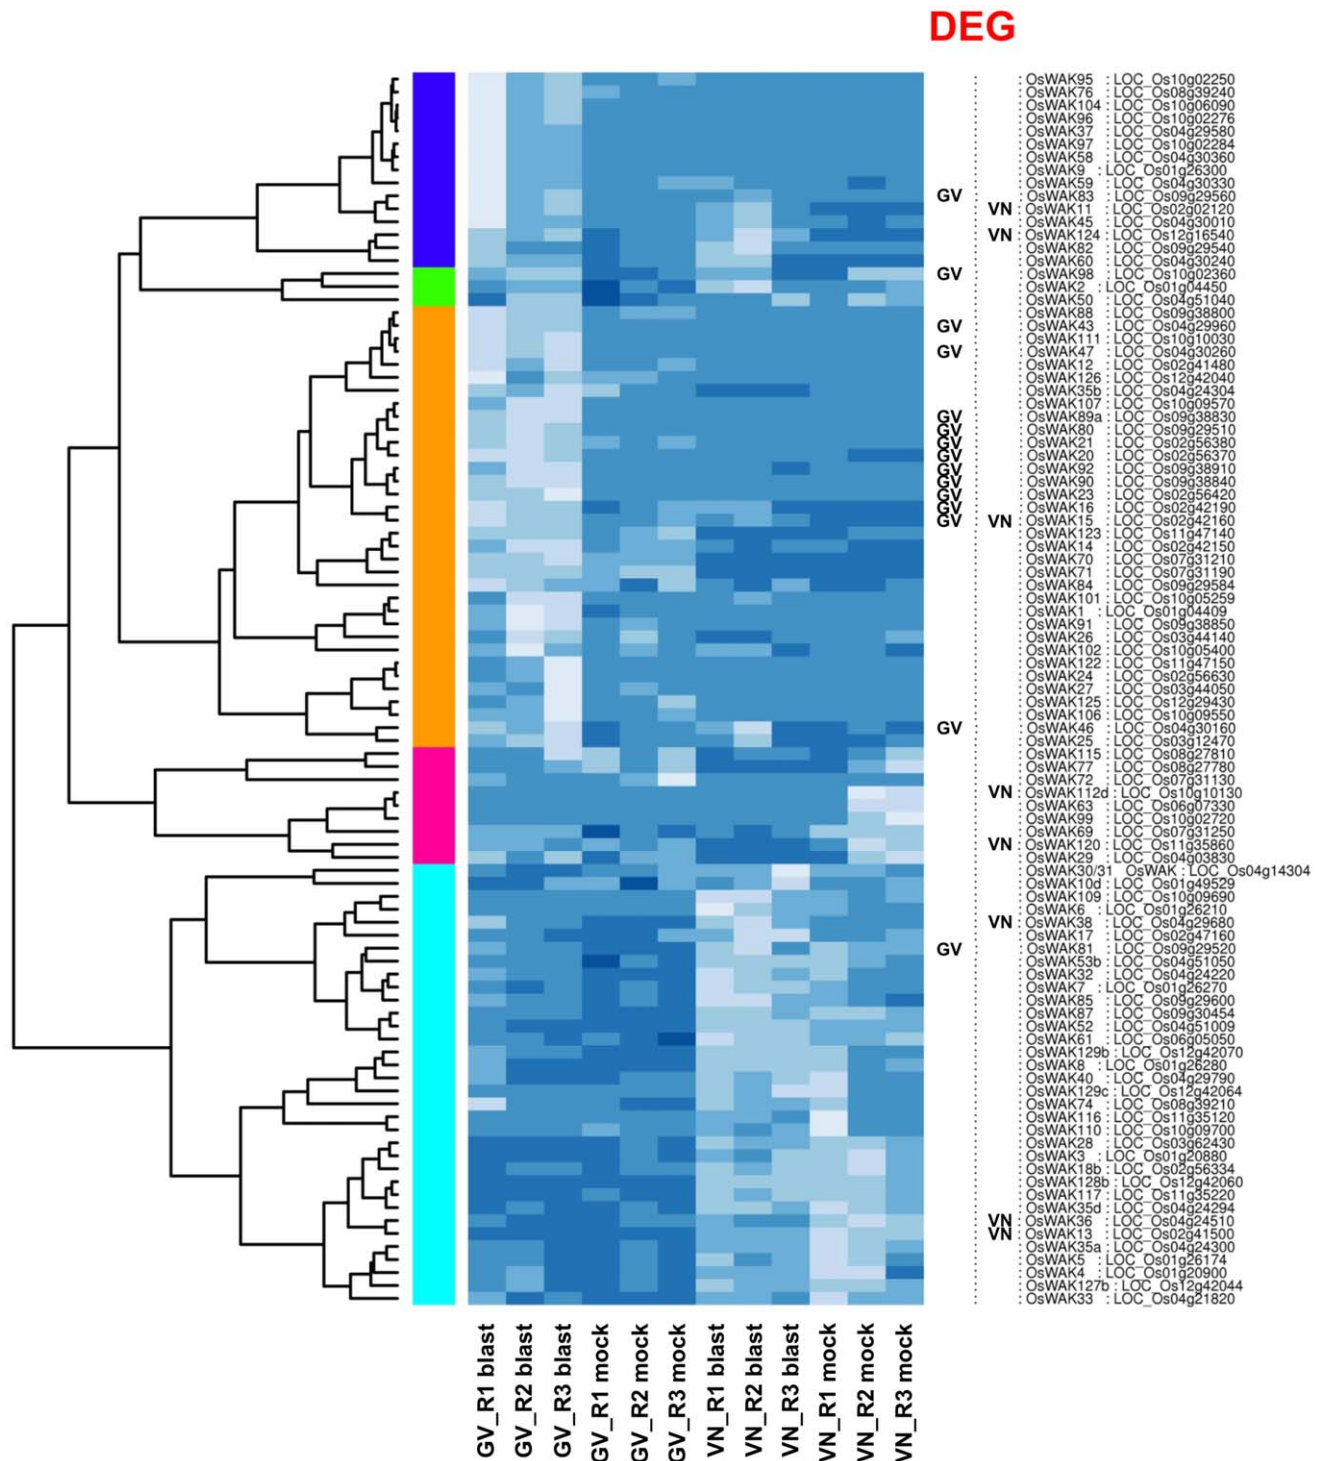

**Figure 7. Hierarchical clustering of OsWAK gene expression.** Gigante Vercelli (GV) and Vialone Nano (VN) *OsWAK* gene expression as affected by blast infection in the different treatments (blast or mock inoculated) and biological replicates (R1, R2, R3). Genes called as DEGs are indicated on the right border of the heatmap. Colored bars on the left of the heatmap mark distinct major branches in the clustering tree grouping genes with similar expression pattern. The colour scale indicates the expression value (light blue indicate higher expression value, darker blue indicates lower gene expression values). The heat map was generated with custom scripts based on heatmap.2 function as available in the 'gplots' Bioconductor package.

doi:10.1371/journal.pone.0051609.g007

genes involved in perception (*OsWAK*, putative disease resistance protein rp1, NB-ARC/LRR disease resistance protein, putative R protein), signalling (several *OsWRKY*s and *LTS-RLK* genes) and

genes participating to downstream defence pathways induced to block pathogen invasion, such as the GO group “defence response to fungus” genes (GO:0050832: *chitinase17*, *peroxidase*, *FMO*, *WIP4*)

**Table 4.** WAK (Wall Associated Kinase) genes modulated in Gigante Vercelli and Vialone Nano.

| <b>Gigante Vercelli</b> |                                                                           |                                    |                                     |                    |            |
|-------------------------|---------------------------------------------------------------------------|------------------------------------|-------------------------------------|--------------------|------------|
| <b>id</b>               | <b>MSU 6.12 description</b>                                               | <b>Mock inoculated<sup>a</sup></b> | <b>Blast inoculated<sup>a</sup></b> | <b>Fold change</b> | <b>FDR</b> |
| LOC_Os09g38830          | OsWAK89a - OsWAK receptor-like protein kinase                             | 0.36                               | 10.91                               | 30.15              | 0.02       |
| LOC_Os09g29560          | OsWAK83 - OsWAK pseudogene                                                | 16.28                              | 261.69                              | 16.07              | 4.00E-003  |
| LOC_Os04g30260          | OsWAK47 - OsWAK receptor-like protein kinase                              | 1.21                               | 15.75                               | 12.98              | 0.01       |
| LOC_Os09g29510          | OsWAK80 - OsWAK receptor-like protein kinase, expressed                   | 3.09                               | 36.02                               | 11.65              | 2.78E-005  |
| LOC_Os02g56420          | OsWAK23 - OsWAK short gene, expressed                                     | 8.97                               | 81.53                               | 9.09               | 0.00       |
| LOC_Os04g29960          | OsWAK43 - OsWAK receptor-like protein kinase, expressed                   | 10.75                              | 70.60                               | 6.57               | 8.16E-006  |
| LOC_Os09g38840          | OsWAK90 - OsWAK receptor-like protein kinase, expressed                   | 34.93                              | 198.25                              | 5.68               | 9.23E-006  |
| LOC_Os04g30160          | OsWAK46 - OsWAK receptor-like protein kinase, expressed                   | 58.60                              | 220.55                              | 3.76               | 0.01       |
| LOC_Os02g56370          | OsWAK20 - OsWAK receptor-like protein kinase, expressed                   | 110.49                             | 408.13                              | 3.69               | 2.48E-005  |
| LOC_Os02g56380          | OsWAK21 - OsWAK receptor-like cytoplasmic kinase<br>OsWAK-RLCK, expressed | 159.08                             | 586.36                              | 3.69               | 8.19E-006  |
| LOC_Os02g42190          | OsWAK16 - OsWAK receptor-like protein kinase                              | 89.20                              | 296.79                              | 3.33               | 3.89E-004  |
| LOC_Os09g29520          | OsWAK81 - OsWAK receptor-like cytoplasmic kinase<br>OsWAK-RLCK, expressed | 49.89                              | 165.73                              | 3.32               | 0.03       |
| LOC_Os09g38910          | OsWAK92 - OsWAK receptor-like protein kinase, expressed                   | 78.23                              | 230.60                              | 2.95               | 0.04       |
| LOC_Os10g02360          | OsWAK98 - OsWAK receptor-like cytoplasmic kinase<br>OsWAK-RLCK, expressed | 159.85                             | 384.81                              | 2.41               | 0.02       |
| LOC_Os02g42160          | OsWAK15 - OsWAK receptor-like protein kinase                              | 104.13                             | 231.66                              | 2.23               | 0.03       |
| <b>Vialone Nano</b>     |                                                                           |                                    |                                     |                    |            |
| <b>id</b>               | <b>MSU 6.12 description</b>                                               | <b>Mock inoculated<sup>a</sup></b> | <b>Blast inoculated<sup>a</sup></b> | <b>Fold Change</b> | <b>FDR</b> |
| LOC_Os02g02120          | OsWAK11 - OsWAK receptor-like protein kinase                              | 60.76                              | 277.01                              | 4.56               | 0.02       |
| LOC_Os12g16540          | OsWAK124 - OsWAK receptor-like protein OsWAK-RLP,<br>expressed            | 93.86                              | 325.57                              | 3.47               | 0.03       |
| LOC_Os04g29680          | OsWAK38 - OsWAK receptor-like protein kinase, expressed                   | 64.48                              | 216.66                              | 3.36               | 5.78E-004  |
| LOC_Os02g42160          | OsWAK15 - OsWAK receptor-like protein kinase                              | 34.69                              | 98.26                               | 2.83               | 0.01       |
| LOC_Os02g41500          | OsWAK13 - OsWAK receptor-like protein kinase, expressed                   | 277.09                             | 133.46                              | 0.48               | 0.02       |
|                         | OsWAK36 - OsWAK receptor-like protein kinase, expressed                   | 191.57                             | 64.74                               | 0.34               | 2.25E-003  |
| LOC_Os11g35860          | OsWAK120 - OsWAK receptor-like protein kinase                             | 101.62                             | 14.87                               | 0.15               | 0.04       |
| LOC_Os10g10130          | OsWAK112d - OsWAK receptor-like protein kinase,<br>expressed              | 112.38                             | 0                                   | -Inf               | 0.01       |

<sup>a</sup>Expression values are reported as DESeq-normalized read counts.  
doi:10.1371/journal.pone.0051609.t004

and genes involved in phytoalexin synthesis (*OsMASL*, *KSS*). *OsWRKY47*, 15, 42, 79, 40 and *OsWRKY50* are present in this sub-network, again supporting the crucial role of *OsWRKYs* in fine tuning blast response strategies. A smaller sub-network B included genes specifically involved in phytoalexin biosynthesis, while the small sub-network C mainly grouped genes induced during preliminary stages of the perception and downstream defence responses (*WAKs* and *GH17*). Genes involved in signalling (*MAPK* and *OsWRKY*) are present in sub-network D, which could be potentially involved in specific interactions, as suggested by the presence of *BTB4*, a member of the Bric-a-Brac/Tramtrack/Broad Complex (*BTB*) gene family. *BTB* proteins direct the selective ubiquitination of proteins following their assembly into Cullin3-based ubiquitin ligases, allowing selective breakdown of short-lived regulatory proteins, which is a key feature of many signal transduction pathways [77]. The sub-network E in the centre of the large network, is linked to all the above mentioned sub-clusters and included only signalling-related genes, indicating that it could potentially play a central role as master regulator for

the other sub-networks. The presence of several sub-networks linked together within the large main cluster might suggest that GV resistance response involve a fine coordinated activation and regulation of several pathways that collaborate to confer blast resistance.

## Conclusions

RNA-seq was employed in this study to exploit several advantages of this technique over microarray-based expression profiling; in particular RNA-seq is not dependent from existing genome sequence knowledge, shows reduced background levels, offers higher dynamic range of detection and allows for dissection of expression down to the transcript isoform level. [78].

Whole transcriptome sequence data from the blast-resistant rice genotype Gigante Vercelli (GV) and the susceptible Vialone Nano (VN) at 24 hpi, an inoculation time point that overlaps the early induction of resistance gene-dependent defence reactions in blast resistant rice genotypes, were compared. Plasma membrane damage occurring in blast-resistant rice

**Table 5.** Compared expression of known and putative elicitor sensing/signalling components in Gigante Vercelli (GV) and Vialone Nano (VN).

| ID MSU 6.12    | Gene name/synonyms    | MSU 6.12 description                                                       | Mock inoculated <sup>a</sup> | Blast inoculated <sup>a</sup> | Fold change | FDR       | Listed among DEGs |
|----------------|-----------------------|----------------------------------------------------------------------------|------------------------------|-------------------------------|-------------|-----------|-------------------|
| LOC_Os03g04110 | CEBIP                 | lysM domain-containing GPI-anchored protein precursor, putative, expressed | 1032.09                      | 1830.44                       | 1.77        | 0.5       | NO                |
| LOC_Os08g42580 | OsCERK1 (OsLysM-RLK9) | protein kinase domain containing protein, expressed                        | 614.69                       | 1429.76                       | 2.33        | 5.96E-004 | YES               |
| LOC_Os02g09960 | OsLYK4 (OsLysM-RLK1)  | LYK8, putative, expressed                                                  | 710.33                       | 1103.54                       | 1.55        | 0.52      | NO                |
| LOC_Os06g41980 | OsLYK2 (OsLysM-RLK5)  | LYK8, putative, expressed                                                  | 973.37                       | 969.67                        | 1.00        | 1.00      | NO                |
| LOC_Os11g35330 | OsLysM-RLK7           | LYK, putative, expressed                                                   | 759.72                       | 1775.77                       | 2.34        | 0.25      | NO                |
|                |                       |                                                                            | 196.42                       | 486.75                        | 2.48        | 0.19      | NO                |
|                |                       |                                                                            | 15.9                         | 73.67                         | 4.63        | 0.01      | YES               |
|                |                       |                                                                            | 16.75                        | 53.55                         | 3.2         | 0.16      | NO                |
|                |                       |                                                                            | 19.93                        | 145.12                        | 7.28        | 0.03      | YES               |
|                |                       |                                                                            | 15.91                        | 43.17                         | 2.71        | 0.56      | NO                |

<sup>a</sup>Expression values are reported as DESeq-normalized read counts.  
doi:10.1371/journal.pone.0051609.t005

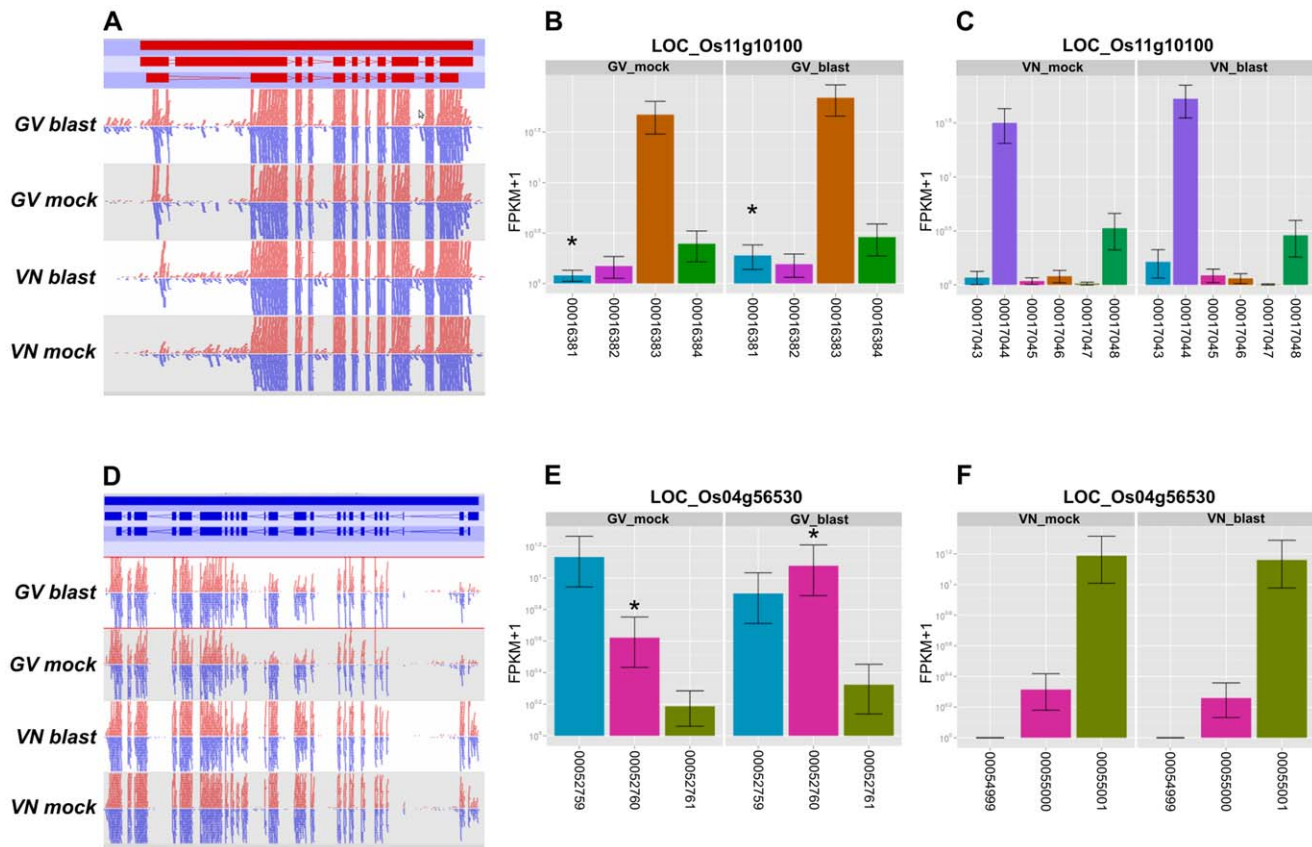

**Figure 8. MAP3K isoform analysis.** **A:** MAP3K.3 (LOC\_Os11g10100) read mapping pattern in mock and blast inoculation conditions in Gigante Vercelli (GV) and Vialone Nano (VN) (red bars in the upper panel represent gene, mRNA and coding sequence structure respectively from the upper to the lower bar); red and blue segments above and below the midline represent reads mapping to forward and reverse strands, respectively. **B:** transcript isoforms and associated Cufflinks expression values in GV; **C:** transcript isoforms and associated Cufflinks expression values in VN. **D:** MAP3K.1 (LOC\_Os04g56530) reads mapping pattern in mock and blast inoculation conditions in GV and VN (blue bars in the upper panel represent gene, mRNA and coding sequence structure respectively from the upper to the lower bar); red and blue segments above and below the midline represent reads mapping to forward and reverse strands, respectively. **E:** transcript isoforms and associated Cufflinks expression values in GV; **F:** transcript isoforms and associated cufflink expression values in VN. Differentially expressed isoforms are indicated by asterisks. doi:10.1371/journal.pone.0051609.g008

genotypes is slightly deferred with respect to 24 hpi, indicating that crucial events responsible for halting blast infection should be analyzed within this temporal frame. The analysis provided an unprecedented global overview of the defence processes differentiating a durable resistant from a susceptible response to blast infection that could ultimately be related to the resistant phenotype. Differential responses included a prompt induction in GV of DPB genes producing phytocassane, momilactone and oryzaalexin S phytoalexins. As prompt accumulation of phytocassanes and momilactones alone is known to effectively limit *M. oryzae* spreading [39], GV resistance most likely exploits the available spectrum of defensive diterpene phytoalexin compounds (i.e. including oryzaalexin S). Simultaneously, genes encoding well-characterized antifungal enzymes encompassing class I chitinases and glycosyl hydrolases were strongly up-regulated. These classes of defence response genes were missing or weakly paralleled in VN. Differences in the induction of this battery of early defence responses between resistant and susceptible genotypes appears to be coordinated, on the basis of our expression data, by discrete members of signal transduction pathways components that include WRKY transcription factors, WAK family of elicitor receptors, chitin-oligosaccharide sensing machinery and mitogen-activated protein kinase

(MAPK) cascades. Adoption of the RNA-Seq approach also allowed to uncover an additional level of regulation in the resistant blast response consisting in the modulation of discrete isoforms of *WRKY* and *MAP3K* transcripts and this response was observed in GV but not in VN. Differential transcript levels both for downstream effector genes and genes involved in regulatory functions in the susceptible genotype ranged from lower gene expression to abolishment of gene transcription. This behaviour might be ascribed to the lack of effective pathogen-sensing mechanisms and, possibly, to the effect of pathogen effectors suppressing VN basal defence responses. Finally, by utilizing expression pattern-based selection criteria, a list of RGAs representing candidates for GV resistance functions were identified and assigned to rice chromosomes. These will represent useful targets in assisting the map-based isolation of the genuine GV resistance gene(s). Most of the genes analysed in detail in this work were included in a co-regulatory network that supports a coordinated regulation of GV resistant response to blast infection. A sub-network containing only signalling-related genes was identified, suggesting that genes included might play central roles as master regulators for the other sub-networks. The data presented here should help to further clarify the mechanistic events underlying successful and durable

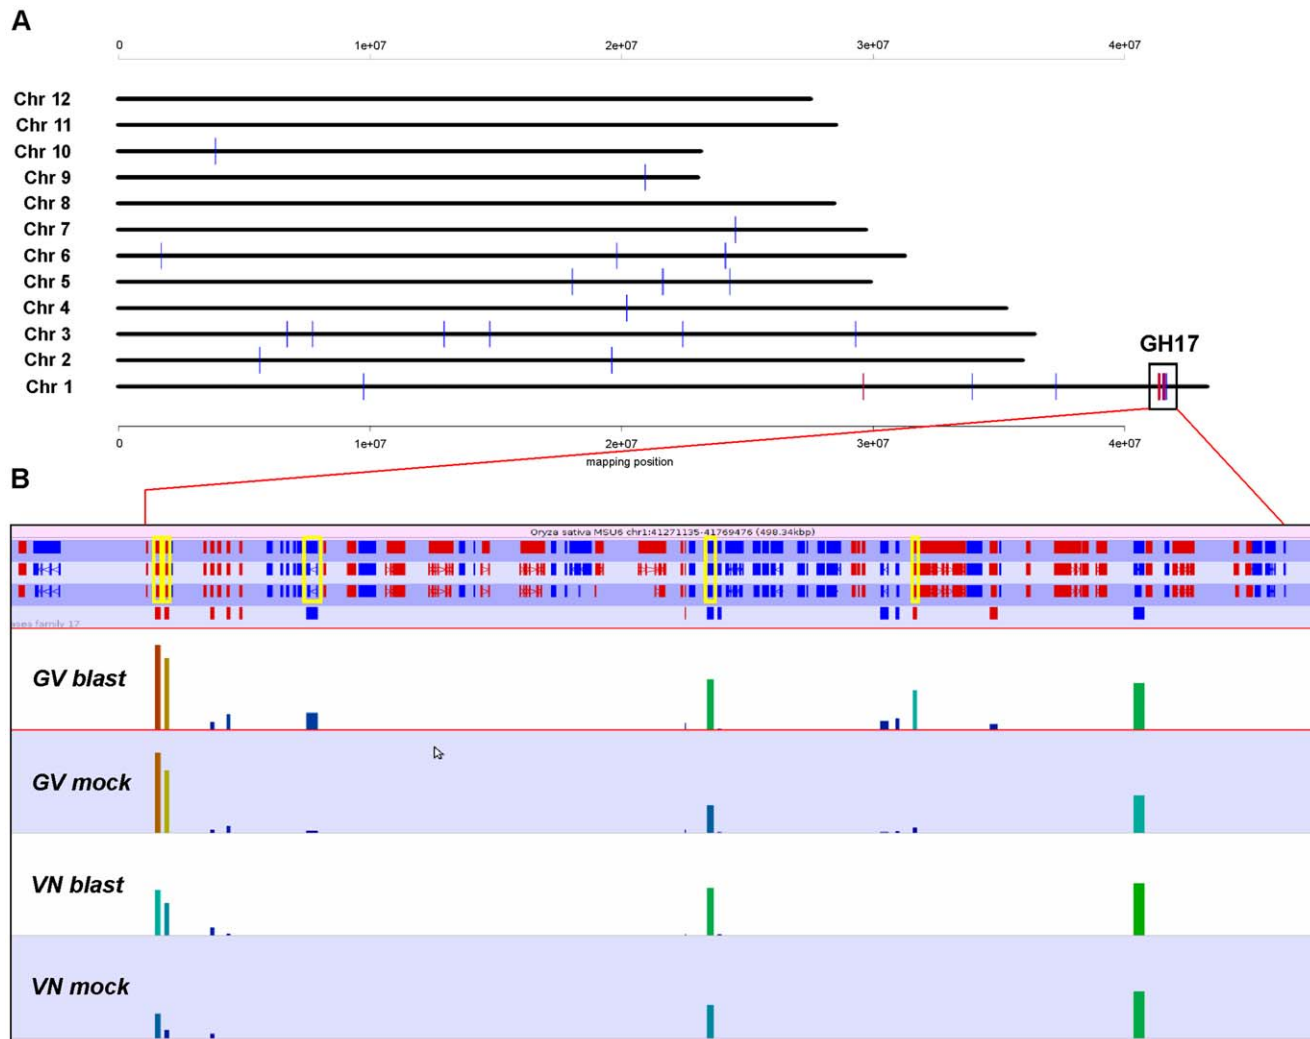

**Figure 9. Analysis of differential gene expression for glycosyl hydrolase family 17 (GH17) genes.** **A:** Chromosome localizations of glycosyl hydrolase family 17 (GH17) genes. Blue bars represent all GH17 genes. Red bars indicate significantly up-regulated genes in Gigante Vercelli (GV) upon blast infection; physical distances for each rice chromosome are also indicated (mapping position values in millions bp). **B:** Detail of the chromosome 1 region boxed in panel A. The 350 kb region containing 14 GH17 genes is magnified and GH17 genes are indicated with a red (forward) or blue (reverse) mark below genes. Bars with heights proportional to read counts in GV and Vialone Nano (VN) are shown below genes. The five GH17 genes significantly up-regulated in GV (DESeq calls) are boxed in yellow.  
doi:10.1371/journal.pone.0051609.g009

resistance against *M. oryzae* and functional studies on the relevant genes are expected to prove useful in the improvement of blast susceptible rice germplasm.

## Materials and Methods

### Plant Material and Blast Infection Procedures

The experiments were carried out with *Oryza sativa* L. cvs. Gigante Vercelli and Vialone Nano. Gigante Vercelli is an old Italian variety released in 1946 and is characterized by a durable resistance to blast, while Vialone nano was released in 1937 and is highly susceptible to rice blast. Rice seeds were germinated in the dark at 28°C and distributed into pots with three biological replicates each for the control (mock inoculated) and blast inoculated conditions. Fifteen plantlets for each biological replicate were grown for 20 days at 28°C in a growth chamber. *Magnaporthe oryzae* inoculation was performed using three Italian blast isolates It2, It3 and It10 from the CIRAD collection (Montpellier, France),

and previously described by [29]. These strains were cultured as previously described [76]. Conidia were harvested from plates by rinsing with sterile distilled water and filtering through two layers of gauze and a 50,000 conidia/ml suspension with 0.5% gelatine was used for inoculation. The suspension solution without conidia was used to spray the control plants (mock inoculation). Rice plants were incubated for 16 h at 28°C and 99.9% relative humidity in the dark and then transferred back to the previous growth conditions for eight hours before leaves sampling. After seven days, macroscopic phenotypes (necrosis, lesions) on rice leaves were observed on the susceptible genotype Vialone Nano acting as control of the inoculation procedure.

### Illumina GAIIX Sequencing

Total RNA was isolated using Trizol reagent (Invitrogen) according to the manufacturer's instructions. Five micrograms of total RNA were subjected to library preparation using the "TruSeq RNA sample preparation kit (FC-122-1001)" following

**Table 6.** Comparison of expression values for significantly up-regulated genes belonging to the GO group “defence response to fungus” (GO:0050832) in Gigante Vercelli and Vialone Nano.

| Gigante Vercelli          |                                                                           |                              |                               |             |           |                   |
|---------------------------|---------------------------------------------------------------------------|------------------------------|-------------------------------|-------------|-----------|-------------------|
| id                        | MSU 6.12 description                                                      | Mock inoculated <sup>a</sup> | Blast inoculated <sup>a</sup> | Fold Change | FDR       | Listed among DEGs |
| LOC_Os03g08410            | flavin-containing monooxygenase family protein, putative, expressed       | 0.72                         | 34.41                         | 47.54       | 2.22E–007 | YES               |
| LOC_Os03g13180            | peroxidase precursor, putative, expressed                                 | 1.84                         | 17.29                         | 9.38        | 0.020     | YES               |
| LOC_Os05g33130            | CHIT17 - Chitinase family protein precursor, expressed                    | 4.70                         | 176.21                        | 37.49       | 1.45E–004 | YES               |
| LOC_Os06g51050            | CHIT7 - Chitinase family protein precursor, expressed                     | 66.82                        | 537.09                        | 8.04        | 3.15E–007 | YES               |
| LOC_Os08g17680            | stromal cell-derived factor 2-like protein precursor, putative, expressed | 1294.12                      | 2685.46                       | 2.08        | 0.030     | YES               |
| LOC_Os11g37950            | WIP3 - Wound-induced protein precursor, expressed                         | 54.82                        | 463.30                        | 8.45        | 5.97E–013 | YES               |
| LOC_Os11g37960            | WIP4 - Wound-induced protein precursor, expressed                         | 185.27                       | 973.62                        | 5.26        | 7.97E–011 | YES               |
| Vialone Nano <sup>b</sup> |                                                                           |                              |                               |             |           |                   |
| id                        | MSU 6.12 description                                                      | Mock inoculated <sup>a</sup> | Blast inoculated <sup>a</sup> | Fold Change | FDR       | Listed among DEGs |
| LOC_Os05g33130            | CHIT17 - Chitinase family protein precursor, expressed                    | 1.26                         | 2.77                          | 2.19        | 0.990     | NO                |
| LOC_Os06g51050            | CHIT7 - Chitinase family protein precursor, expressed                     | 45.49                        | 230.12                        | 5.06        | 0.460     | NO                |
| LOC_Os08g17680            | stromal cell-derived factor 2-like protein precursor, putative, expressed | 1427.62                      | 2013.28                       | 1.41        | 0.700     | NO                |
| LOC_Os11g37950            | WIP3 - Wound-induced protein precursor, expressed                         | 28.07                        | 404.86                        | 14.42       | 0.010     | YES               |
| LOC_Os11g37960            | WIP4 - Wound-induced protein precursor, expressed                         | 74.53                        | 548.98                        | 7.37        | 0.110     | NO                |

<sup>a</sup>Expression values are reported as DESeq-normalized read counts.<sup>b</sup>Lack in the VN list of the corresponding GV induced gene denotes expression below the expression cutoff.

doi:10.1371/journal.pone.0051609.t006

the manufacturer’s instructions. Libraries were amplified by 15 cycles of PCR and then purified and size selected for an average size of 300 bp by a 2% low range ultra agarose gel (BIO-RAD). RNA quality and library concentration and size were assayed on a 2100 Bioanalyzer (Agilent). Libraries were paired end sequenced for 37 bp on each end on an Illumina Genome Analyser (GAIIx). Paired end sequencing was employed to improve specificity of mapping over the reference genome due to the relatively small length of end sequencing (37 bp), which may increase risk of the same read mapping to multiple sites. Samples were run using one lane per library.

### Quantitative RT-PCR Analysis

Quantitative RT-PCR was performed using a One Step Real Time PCR System (Applied Biosystems, Foster City, CA, USA) and 100 ng of total RNA per reaction. Primers were designed using Primer3 software (<http://frodo.wi.mit.edu/primer3/>) (Table S11) and primers specificity was evaluated by blasting primer sequences against the NCBI database. The rice ubiquitin-conjugating enzyme E2 constitutively expressed gene [79] was used as reference gene for normalization. PCR amplifications were performed in 25 µl of final volumes containing 2× QuantiFast SYBR® Green Master Mix (Qiagen, Hilden, Germany) and including ROX™ as passive reference dye, 400 µM each primer and 0.25 U/µl Multiscribe™ Reverse Transcriptase (Applied Biosystems). Three technical replicates for each of two biological replicates were performed. Relative gene expression was calculated using the  $2^{-\Delta\Delta C_t}$  method [80].

### Bioinformatic Methods

**Mapping of illumina reads.** The CASAVA pipelines 1.7 and 1.8 were employed for data processing and basecalling for GV and VN, respectively. As the quality scores encodings for FASTQ files produced by the two pipelines are different (ASCII code +64 vs ASCII code +33, for CASAVA 1.7 and 1.8, respectively) downstream applications (e.g. Bowtie/TopHat) were set accordingly. In both cases, only reads passing Illumina filters reads were kept. Read quality was further assessed by fastQC application and reads containing contaminant primer/adapters and long stretches of poor quality bases were removed as necessary.

The spliced read mapper TopHat version 1.4.1 was used to map reads to Nipponbare (MSU release 6.12) genome setting a minimum intron length of 30 considering rice small intron size [81]. Mapped paired end read were deduplicated with Picard 1.63 and read counts were collected with HTSeq version 0.5.3 (<http://www-huber.embl.de/users/anders/HTSeq>) in the paired end and ‘union’ mode using *Oryza sativa* MSU 6.12 GTF file.

**DEG calling.** Differentially expressed genes were called via DESeq package [82] (version 1.6.0), an R package implementing a model based on negative binomial distribution which was developed with special attention to cope with biological variance [82]. The software was run under R release 2.14. In order to define the set of expressed genes, raw read counts as obtained by HTSeq application were normalized to RPKM (Reads per Kilobase per Million) and genes above the 0.1 RPKM threshold were considered expressed. A combination of fitted versus per-gene dispersion values was implemented as suggested by the

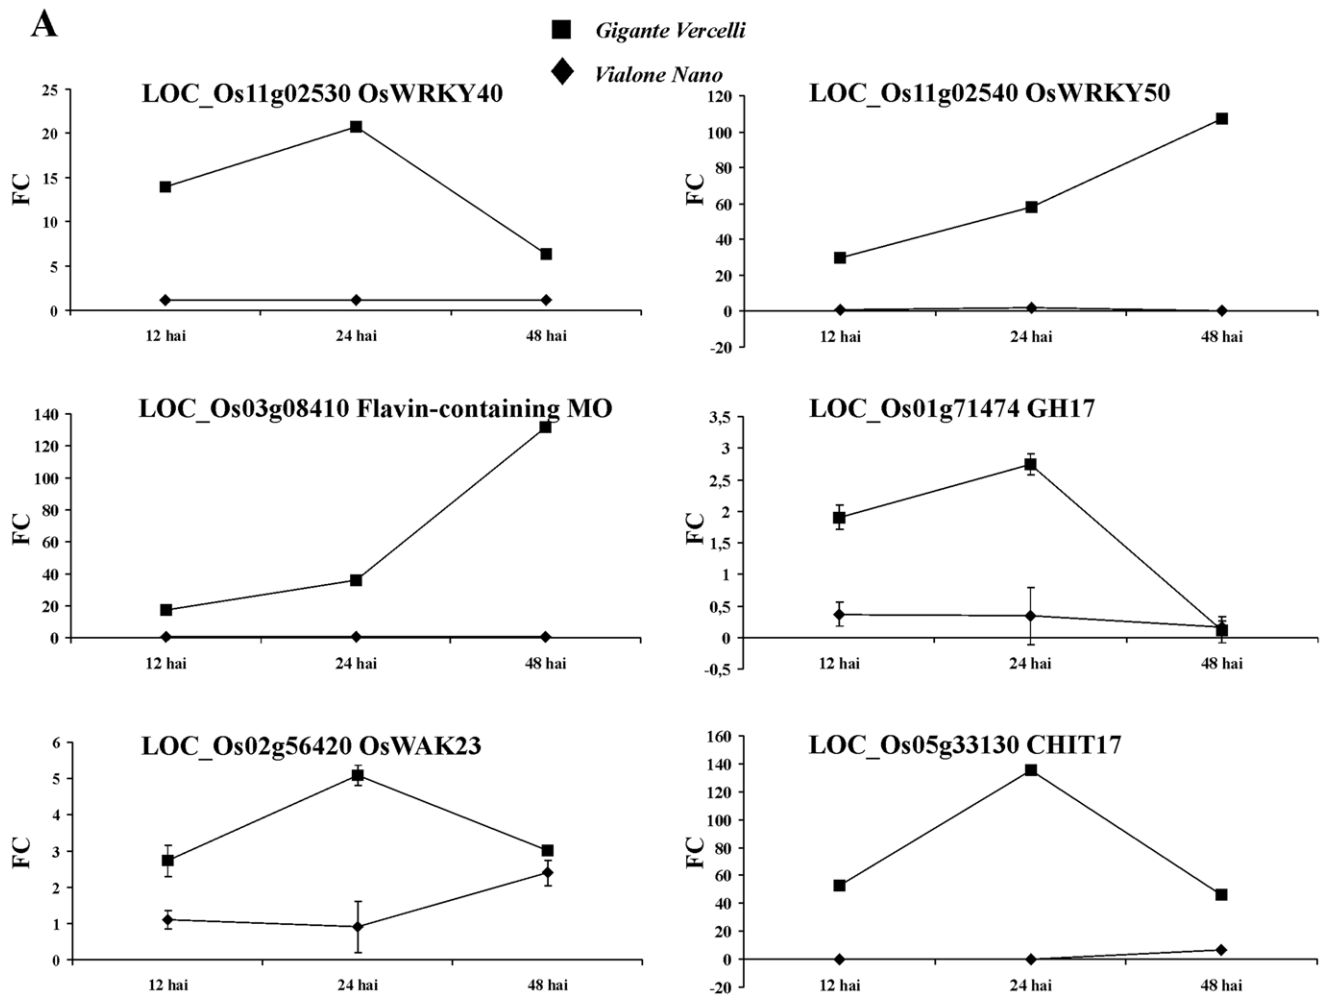

**Figure 10. Time course expression analysis and data validation for six selected differentially expressed genes (DEGs).** **A:** Quantitative RT-PCR at 12, 24 and 48 hours after pathogen inoculation (hai) for six selected DEGs in Gigante Vercelli and Vialone Nano. Values are expressed as fold changes of transcript levels in the inoculated samples with respect to the transcript levels in mock-inoculated rice leaves. Error bars represent SD across all RT-PCR replicates (three from each of two independent inoculations); when error bars are not visible is because their extent is shadowed by filled squares and rhombus indicating the rice genotypes. **B:** Comparisons of transcripts fold changes as detected by RNA-Seq or qRT-PCR expression analysis techniques for the six selected genes in Gigante Vercelli (GV) and Vialone Nano (VN) rice genotypes. doi:10.1371/journal.pone.0051609.g010

default DESeq setting. Separate instances of DESeq CountDataSet objects were created for GV and VN to compute DEG (FDR  $\leq 0.05$ ).

**GO enrichment analyses.** For goseq analyses, as rice database are not yet covered by Goseq, gene lengths were

retrieved with BiomaRt queries (*Oryza sativa* MSU6.12) out of rice Nipponbare cDNA and median length for each rice locus were obtained parsing with R custom scripts. An FDR cutoff of 0.05 was used for GO enrichments. Gene ontology terms for CC, MF and BP were similarly retrieved with BiomaRT queries.

**A**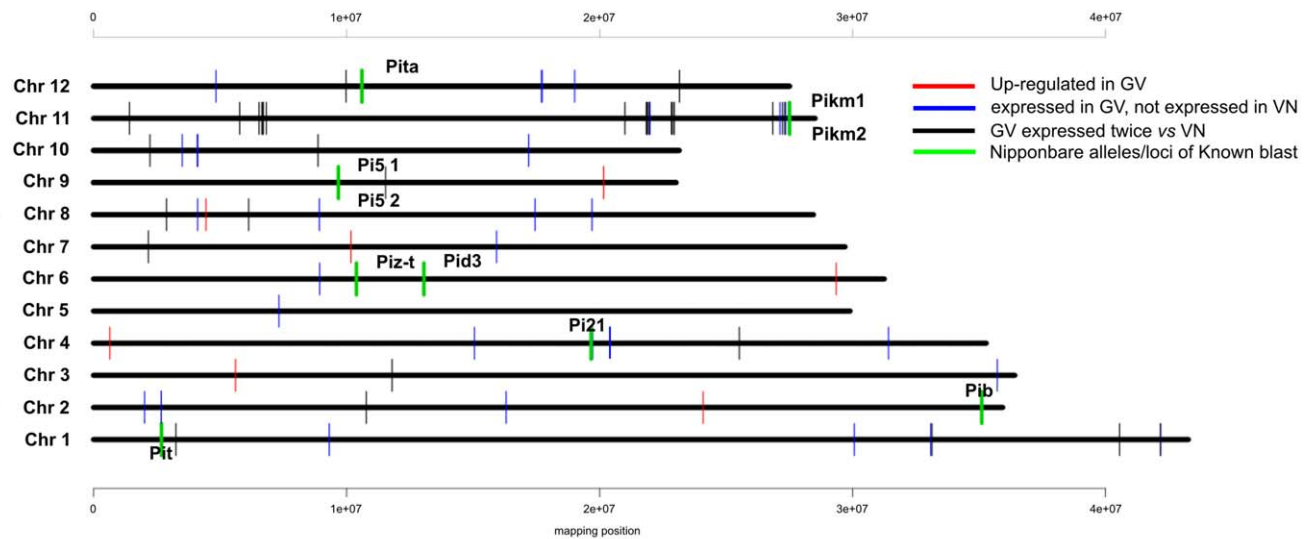**B**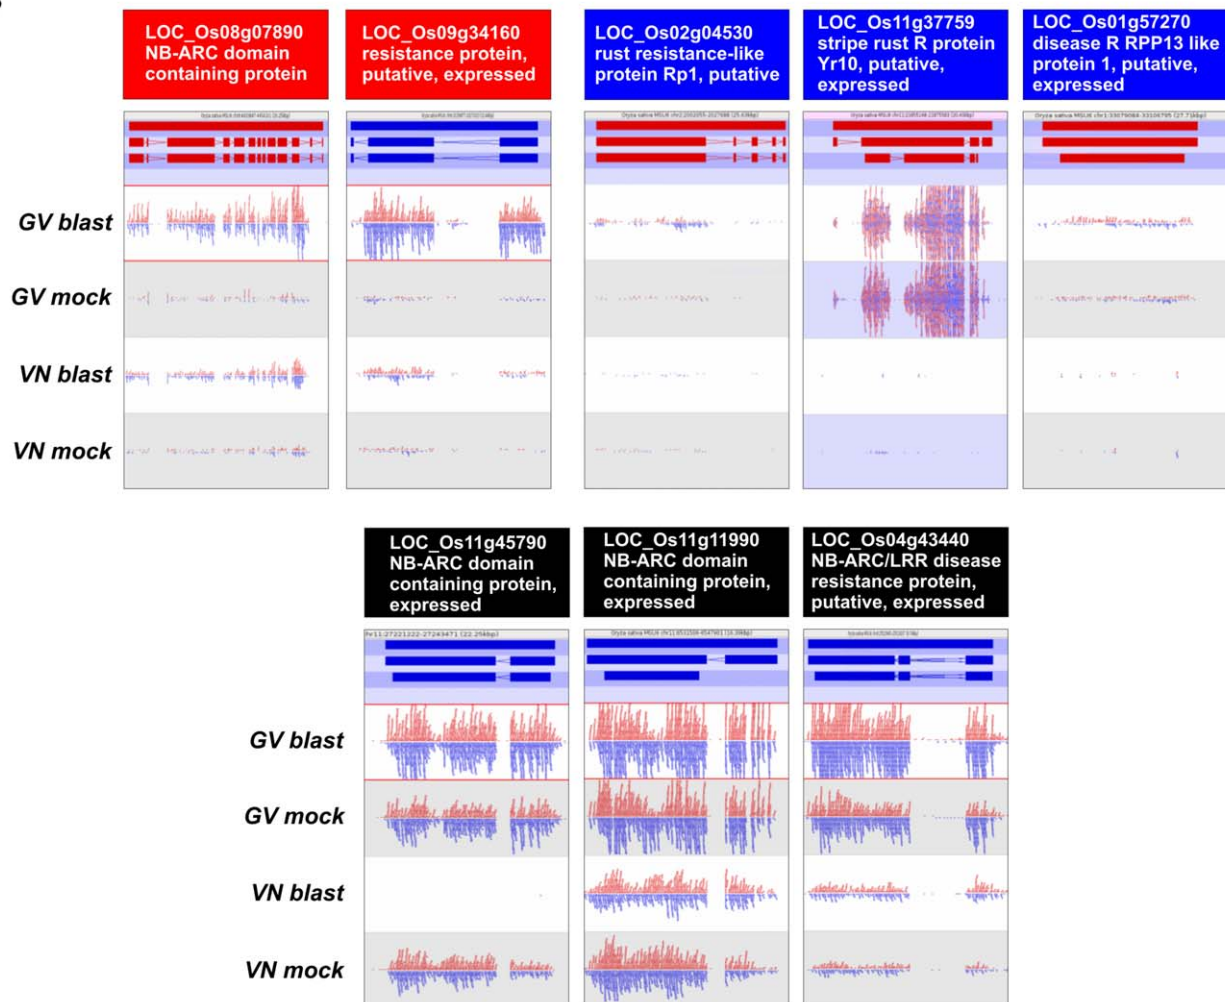

**Figure 11. Expression analysis of Resistance Genes Analogs (RGAs) candidates for Gigante Vercelli (GV) resistance functions. A:** Chromosome localization of candidate resistance (R) genes. Red bars: GV-specific induced RGAs called as DEGs; blue bars: RGAs expressed in GV only

(i.e. expressed in GV, not expressed in Vialone Nano -VN-, regardless to infection responsiveness); black bars: RGAs with at least twofold expression ratio among infected GV and infected VN. Nipponbare loci corresponding to known blast *R* genes are indicated with green, thick bars; physical distances for each rice chromosome are also indicated (mapping position values in millions bp). **B:** Read mapping patterns in mock and blast inoculation conditions of selected RGAs from the three groups listed above for Gigante Vercelli (GV) and Vialone Nano (VN). Each group is color-coded as in legend of panel A. Red and blue bars in the upper panel represent gene, mRNA and coding sequence structure respectively from the upper to the lower bar. Red and blue segments above and below the midlines represent reads mapping to forward and reverse strands, respectively. doi:10.1371/journal.pone.0051609.g011

**Isoform analysis.** Cufflinks version 1.3 was employed for isoform analysis. Picard-deduplicated BAM alignment files from TopHat were employed as cufflinks input. No GTF was provided to cufflinks in order to detect novel transcripts. Cuffmerge module was run with cufflinks-produced-GTF files in combination with MSU6.12 GTF file in order to facilitate comparison and detection of novel transcripts. Cuffdiff was employed for calculating significant differences among isoforms expression and was run

with upper quartile normalization option to improve differential expression calls for less abundant genes and transcripts [83,84].

**Co-regulation analysis.** The correlation analysis was performed as previously described [76]. Briefly, the Visual C++ program (RI-REG) was applied to analyse gene co-regulation based on Pearson correlation coefficient [85] for GV DEGs analysed in the present study (listed in Table S10). The RI-REG software builds a matrix of the gene list with all calculated

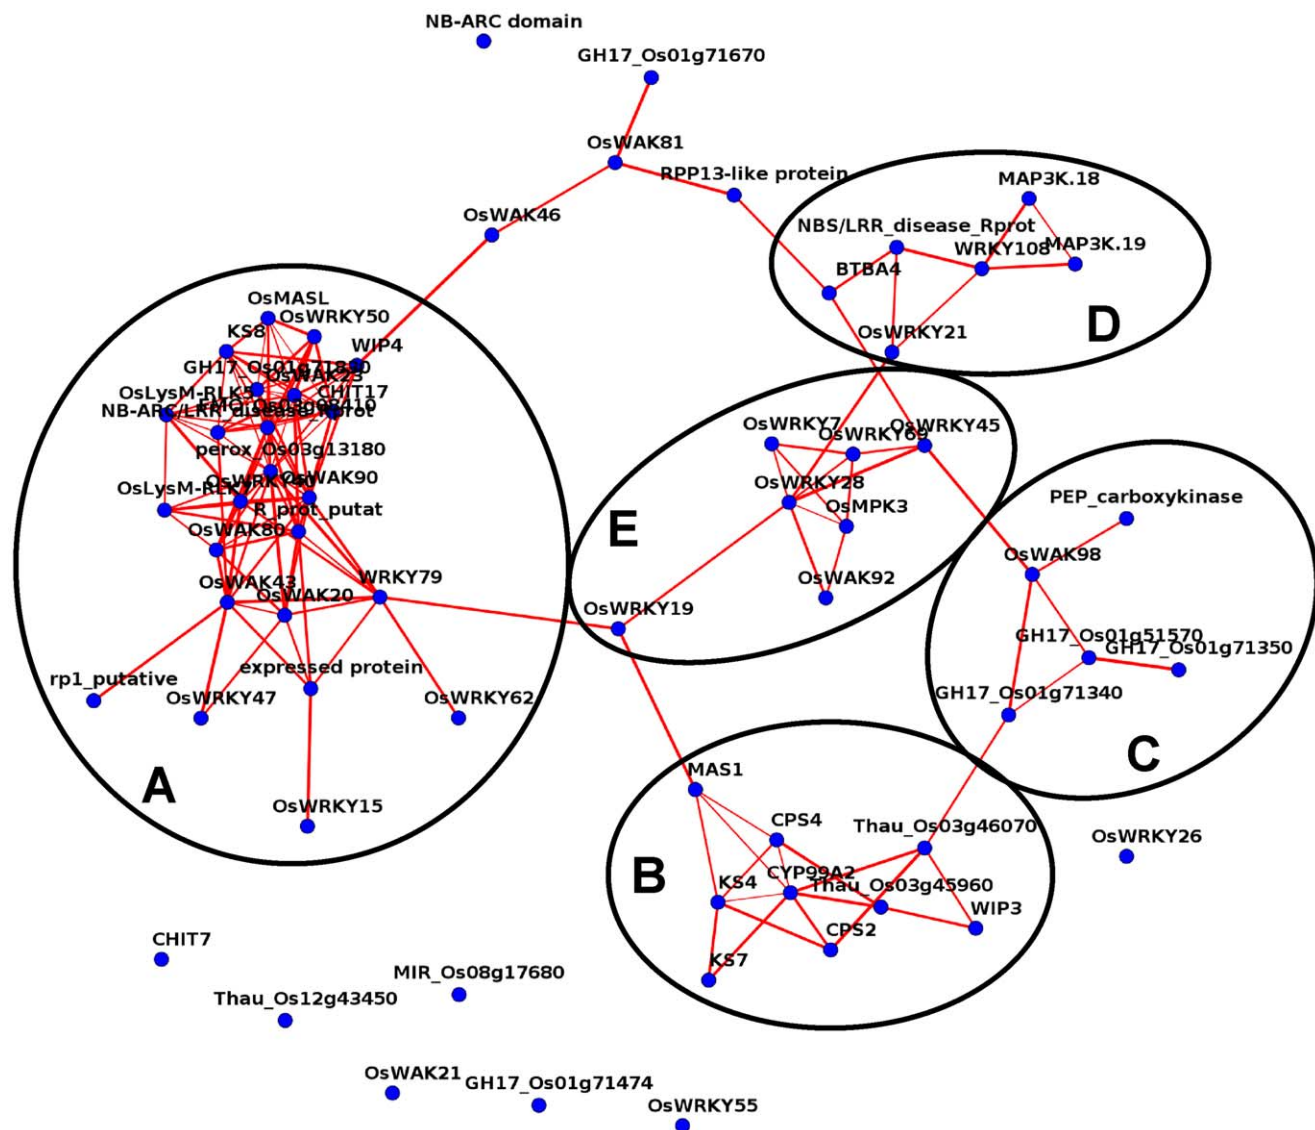

**Figure 12. Co-regulatory networks of genes differentially modulated in response to blast inoculation in Gigante Vercelli (FDR <0.05).** Co-regulation analysis was based on the calculation of pairwise Pearson correlation of logarithmic expression values. Five sub-networks, indicated with letters from A to E, were identified on the basis of pairwise Pearson Correlation coefficient with a threshold value of 0.6. The thickness of the edges is proportional to the Pearson Coefficient value and graphical visualization of the network is based on Fruchterman-Reingold layout algorithm. doi:10.1371/journal.pone.0051609.g012

reciprocal Pearson correlation coefficient. Pearson coefficient was calculated on Rice Expression Matrix (REM), consisting all publicly available Affymetrix experiments (749, as of October 2010) from platform GPL2025 in Gene Expression Omnibus (GEO; <http://www.ncbi.nlm.nih.gov/geo/>). Calculation of Pearson coefficient was based on logarithm values of the data. The GV DEGs network was obtained filtering pairwise Pearson correlation values of 0.6 or higher from the complete matrix. Intensity of arrow colours are proportional to the coefficient between each pair of genes. Graphical representations of gene networks were produced using a force-based layout algorithm of Fruchterman-Reingold available in igraph library (<http://igraph.sourceforge.net>; [86]).

**Miscellaneous bioinformatic methods.** R (version 2.14 and 2.15) and Python (version 2.6) programming languages were used for custom scripts. R packages were mainly obtained from Bioconductor project (<http://www.bioconductor.org/>). Hierarchical clustering and heatmaps and matrix distances for sample clustering were computed over Spearman correlations (a non-parametric measure of statistical dependence between two variables) using R functions.

Gene expression values for Hierarchical clustering were obtained by extracting, for each biological replicate, normalized read counts from DESeq CountDataSet instances. No reordering of samples in heatmaps was made for the sake of clarity. Matrix distances for expression heatmaps were computed over Pearson correlations of gene expression values by means of heatmap.2 function (gplots version 2.10.1 R package).

Samtools utilities [87] were used for merging of SAM files for various purposes (e.g. merging of biological replicates to simplify Seqmonk read mapping visualization). For visualization of read mapping, SAM/BAM files were loaded on Seqmonk application (<http://www.bioinformatics.babraham.ac.uk/projects/seqmonk/>) in the paired-end mode and discarding duplicate reads. Expression barplots of cufflinks-predicted isoforms were generated with cummeRbund R package version 1.0.0. Unless otherwise stated, chromosome maps and other graphical outputs were generated with custom R and Python scripts.

Rice *WRKY* genes in the present study are named according to the CGSNL nomenclature [88].

## Supporting Information

**Figure S1 Spearman correlations among GV and VN samples.** Panel A: Pairwise Spearman correlation (a non-parametric measure of statistical dependence between two variables) coefficients of the expression values in the different GV and VN treatments (blast or mock inoculated) and biological replicates (R1, R2, R3). Panel B: heatmap of the Spearman correlation coefficient for the expression values in the different GV and VN treatments (blast or mock inoculated) and biological replicates (R1, R2, R3). The color scale indicates the degree of correlation (white-yellow, low correlation; orange-red, strong correlation). (TIF)

**Figure S2 DESeq dispersion values plotted against means for GV (A) and VN (B).** Empirical (black dots) and fitted (red lines) values are shown. (TIF)

**Table S1 Expression values reported as DESeq-normalized read counts and fold changes for all the transcribed genes detected in the experiment.** (XLS)

**Table S2 Modulation of phytoalexin genes reported as DESeq-normalized read counts in response to infection (24 h) in GV vs VN rice genotypes.** (DOC)

**Table S3 List of the WRKY genes (as determined by INTERPRO id: IPR003657; “DNA-binding WRKY”) expression values reported as DESeq-normalized read counts detected in GV and VN.** (XLS)

**Table S4 Predicted WRKY isoforms detected for the rice genotypes GV and VN rice genotypes.** (DOC)

**Table S5 Expression values reported as DESeq-normalized read counts of selected genes containing the INTERPRO LYS-M domain (IPR018392; Peptidoglycan-binding lysin domain) in the two GV and VN rice genotypes.** (DOC)

**Table S6 Comparison of GV and VN expression values reported as DESeq-normalized read counts for MAPK, MAPKK and MAPKKK in GV and VN rice genotypes.** (DOC)

**Table S7 Predicted MAP3K isoforms detected for GV and VN rice genotypes.** (DOC)

**Table S8 Expression values, as DESeq normalized expression values, for GV and VN genes tagged by the INTERPRO domain IPR000767 (“disease resistance protein”).** (XLS)

**Table S9 Resistance gene analogs (RGAs) candidates for the GV resistance.** (DOC)

**Table S10 List of the GV DEG used in the Pearson co-regulation analysis.** For each gene, the name of the Affymetrix probe, the LOC name according to MSU Rice Genome Annotation Project, putative function (annotation) and gene symbol adopted in Figure 11 are reported. The Pearson correlation matrix based upon logarithmic values used to draw Figure 11 is also included. (XLS)

**Table S11 List of the gene loci whose transcription profile was evaluated by qRT-PCR.** For each gene the forward (fw) and reverse (rev) primer sequences are provided. (DOC)

## Acknowledgments

We thank Erminio Albertario (Rice research unit) and Donata Pagani (Genomics research centre) for excellent technical assistance. Dr. Paolo Cozzi is fully acknowledged for the crucial contribution in drawing the co-regulatory network in the present study.

## Author Contributions

Conceived and designed the experiments: PB EL L. Cattivelli GV. Performed the experiments: PB CB LO SU L. Crispino PA. Analyzed the data: PB CB LO SU L. Crispino PA PP. Contributed reagents/materials/analysis tools: PB PP L. Cattivelli GV. Wrote the paper: PB PP EL L. Cattivelli GV.

## References

- Khush GS, Jena KK (2009) Current status and future prospects for research on blast resistance in rice (*Oryza sativa* L.). In: Advances in Genetics, Genomics and Control of Rice Blast Disease (Wang GL, Valent B, eds), Dordrecht: Springer, 1–10.
- Lee FN (1994) Rice breeding programs, blast epidemics and blast management in the United States. In Rice blast disease, (RS Ziegler, ed.), C.A.B. International, Wallingford, UK. 489–500.
- Howard RJ, Valent B (1996) Breaking and entering: host penetration by the fungal rice blast pathogen *Magnaporthe grisea*. Annual review of microbiology 50: 491–512.
- Talbot NJ (2003) On the trail of a cereal killer: Exploring the biology of *Magnaporthe grisea*. Annual review of microbiology 57: 177–202.
- Heath MC, Valent B, Howard RJ, Chumley FG (1990) Interactions of two strains of *Magnaporthe grisea* with rice, goosegrass, and weeping lovegrass. Canadian Journal of Botany 68: 1627–1637.
- Kankanala P, Czymmek K, Valent B (2007) Roles for rice membrane dynamics and plasmodesmata during biotrophic invasion by the blast fungus. Plant Cell 19: 707–724.
- Koga H, Dohi K, Nakayachi O, Mori M (2004) A novel inoculation method of *Magnaporthe grisea* for cytological observation of the infection process using intact leaf sheaths of rice plants. Physiological and Molecular Plant Pathology 64: 67–72.
- Dean R, Talbot NJ, Ebbole DJ, Farman ML, Mitchell TK, et al. (2005) The genome sequence of the rice blast fungus *Magnaporthe grisea*. Nature 434: 980–986.
- Yang QZ, Lin F, Fegn SJ, Wang L, Pan QH (2009) Recent progress on molecular mapping and cloning of blast resistance genes in rice (*Oryza sativa* L.). Scientia Agricultura Sinica 42: 1601–1615.
- Liu J, Wang X, Mitchell T, Hu Y, Liu X, et al. (2010) Recent progress and understanding of the molecular mechanisms of the rice-*Magnaporthe oryzae* interaction. Molecular Plant Pathology 11: 419–427.
- Qu S, Liu G, Zhou B, Bellizzi M, Zeng L, et al. (2006) The broad-spectrum blast resistance gene *Pi9* encodes a nucleotide-binding site-leucine-rich repeat protein and is a member of a multigene family in rice. Genetics 172: 1901–1914.
- Zhou B, Qu S, Liu G, Dolan M, Sakai H, et al. (2006) The eight amino-acid differences within three leucine-rich repeats between *Pi2* and *Piz-t* resistance proteins determine the resistance specificity to *Magnaporthe grisea*. Molecular Plant-Microbe Interactions 19: 1216–1228.
- Deng Y, Zhu X, Xu, Chen H, He Z. (2009) Map-based cloning and breeding application of a broad-spectrum resistance gene *Pigm* to rice blast. In: Advances in Genetics, Genomics and Control of Rice Blast Disease (Wang GL, Valent B, eds), Dordrecht: Springer, 161–171.
- Jeung JU, Kim BR, Cho YC, Han SS, Moon HP, et al. (2007) A novel gene, *Pi40(t)*, linked to the DNA markers derived from NBS-LRR motifs confers broad spectrum of blast resistance in rice. Theoretical and Applied Genetics 115: 1163–1177.
- Wu J-L, Fan Y-Y, Li D-B, Zheng K-L, Leung H, et al. (2005) Genetic control of rice blast resistance in the durably resistant cultivar Gumei 2 against multiple isolates. Theoretical and Applied Genetics 111: 50–56.
- Skamnioti P, Gurr SJ (2009) Against the grain: safeguarding rice from rice blast disease. Trends in Biotechnology 27: 141–150.
- Fukuoka S, Saka N, Koga H, Ono K, Shimizu T, et al. (2009) Loss of function of a proline-containing protein confers durable disease resistance in rice. Science 325: 998–1001.
- Hayashi N, Inoue H, Kato T, Funao T, Shirota M, et al. (2010) Durable panicle blast-resistance gene *Pb1* encodes an atypical CC-NBS-LRR protein and was generated by acquiring a promoter through local genome duplication. The Plant Journal 64: 498–510.
- Vergne E, Ballini E, Marques S, Sidi Mammar B, Droc G, et al. (2007) Early and specific gene expression triggered by rice resistance gene *Pi33* in response to infection by ACE1 avirulent blast fungus. The New Phytologist 174: 159–171.
- Li Q, Chen F, Sun L, Zhang Z, Yang Y, et al. (2006) Expression profiling of rice genes in early defense responses to blast and bacterial blight pathogens using cDNA microarray. Physiological and Molecular Plant Pathology 68: 51–60.
- Vergne E, Grand X, Ballini E, Chalvon V, Saindrenan P, et al. (2010) Preformed expression of defense is a hallmark of partial resistance to rice blast fungal pathogen *Magnaporthe oryzae*. BMC Plant Biology 10: 206.
- Jantasuriyarat C, Gowda M, Haller K (2006) Large-scale identification of expressed sequence tags involved in rice and rice blast fungus interaction. Plant Physiology 138: 105–115.
- Libault M, Farmer A, Brechenmacher L, Drnevich J, Langley RJ, et al. (2010) Complete transcriptome of the soybean root hair cell, a single-cell model, and its alteration in response to *Bradyrhizobium japonicum* infection. Plant Physiology 152: 541–552.
- Matsumura H, Yoshida K, Luo S, Kimura E, Fujibe T, et al. (2010) High-throughput SuperSAGE for digital gene expression analysis of multiple samples using next generation sequencing. PLOS ONE 5: e12010.
- Mizuno H, Kawahara Y, Sakai H, Kanamori H, Wakimoto H, et al. (2010) Massive parallel sequencing of mRNA in identification of unannotated salinity stress-inducible transcripts in rice (*Oryza sativa* L.). BMC Genomics 11: 683.
- Nagalakshmi U, Wang Z, Waern K, Shou C (2008) The transcriptional landscape of the yeast genome defined by RNA sequencing. Science 320: 1344–1349.
- Wang ET, Sandberg R, Luo S, Khrebtkova I, Zhang L, et al. (2008) Alternative isoform regulation in human tissue transcriptomes. Nature 456: 470–476.
- Faivre-Rampant O, Bruschi G, Abbruscato P, Cavigiolo S, Picco AM, et al. (2011) Assessment of genetic diversity in Italian rice germplasm related to agronomic traits and blast resistance (*Magnaporthe oryzae*). Molecular Breeding 27: 233–246.
- Roumen E, Levy M, Notteghem JL (1997) Characterisation of the European pathogen population of *Magnaporthe grisea* by DNA fingerprinting and pathotype analysis. European Journal of Plant Pathology 103: 363–371.
- Lu T, Lu G, Fan D, Zhu C, Li W, et al. (2010) Function annotation of the rice transcriptome at single-nucleotide resolution by RNA-seq. Genome Research 20: 1238–49.
- Lundberg E, Fagerberg L, Klevebring D, Matic I, Geiger T, et al. (2010) Defining the transcriptome and proteome in three functionally different human cell lines. Molecular Systems Biology 6: 450.
- Marcel S, Sawers R, Oakeley E, Angliker H, Paszkowski U (2010) Tissue-adapted invasion strategies of the rice blast fungus *Magnaporthe oryzae*. The Plant Cell 22: 3177–3187.
- Young MD, Wakefield MJ, Smyth GK, Oshlack A (2010) Gene ontology analysis for RNA-seq: accounting for selection bias. Genome Biology 11: R14.
- Ahuja I, Kissen R, Bones AM (2012) Phytoalexins in defense against pathogens. Trends in Plant Science 17: 73–90.
- Okada K (2011) The Biosynthesis of Isoprenoids and the Mechanisms Regulating It. Bioscience, Biotechnology and Biochemistry 75: 1219–1225.
- Dillon VM, Overton J, Grayer RJ, Harborne JB (1997) Differences in phytoalexin response among rice cultivars of different resistance to blast. Phytochemistry 44: 599–603.
- Umehura K, Ogawa N, Shimura M, Koga J, Usami H, et al. (2003) Possible role of phytocassane, rice phytoalexin, in disease resistance of rice against the blast fungus *Magnaporthe grisea*. Bioscience Biotechnology and Biochemistry 67: 899–902.
- Koga J, Ogawa N, Yamauchi T, Kikuchi M (1997) Functional moiety for the antifungal activity of phytocassane E, a diterpene phytoalexin from rice. Phytochemistry 44: 249–253.
- Hasegawa M, Mitsuhashi I, Seo S, Imai T, Koga J, et al. (2010) Phytoalexin accumulation in the interaction between rice and the blast fungus. Molecular Plant-Microbe Interactions 23: 1000–1011.
- Okada K, Okada K, Miyamoto K, Koga J, Shibuya N, et al. (2009) OsTGAP1, a bZIP transcription factor, coordinately regulates the inductive production of diterpenoid phytoalexins in rice. The Journal of Biological Chemistry 284: 26510–26518.
- Mao G, Meng X, Liu Y, Zheng Z, Chen Z, et al. (2011) Phosphorylation of a WRKY transcription factor by two pathogen-responsive MAPKs drives phytoalexin biosynthesis in Arabidopsis. The Plant Cell 23: 1639–1653.
- Xu Y-H, Wang J-W, Wang S, Wang J-Y, Chen X-Y (2004) Characterization of GaWRKY1, a Cotton Transcription Factor That Regulates the Sesquiterpene Synthase Gene (1)-d-Cadinene Synthase-A. Plant Physiology 135: 507–515.
- Ross CA, Liu Y, Shen QXJ (2007) The *WRKY* gene family in rice (*Oryza sativa*). Journal of Integrative Plant Biology 49: 827–842.
- Chen X, Ronald PC (2011) Innate immunity in rice. Trends in Plant Science 16: 451–459.
- Kaku H, Inoue H, Takatsuki H (2012) Rice *WRKY45* plays important roles in fungal and bacterial disease resistance. Molecular Plant Pathology 13: 83–94.
- Akimoto-Tomiya C, Sakata K, Yazaki J, Nakamura K, Shimbo K, et al. (2003) Rice gene expression in response to N-acetylchitooligosaccharide elicitor: comprehensive analysis by DNA microarray with randomly selected ESTs. Plant Molecular Biology 537–551.
- Chujo T, Takai R, Akimoto-Tomiya C, Ando S, Minami E, et al. (2007) Involvement of the elicitor-induced gene *OsWRKY53* in the expression of defense-related genes in rice. Biochimica et Biophysica Acta 1769: 497–505.
- Zhang J, Peng Y, Guo Z (2008) Constitutive expression of pathogen-inducible *OsWRKY31* enhances disease resistance and affects root growth and auxin response in transgenic rice plants. Cell Research 18: 508–521.
- Shimono M, Sugano S, Nakayama A, Jiang C-J, Ono K, et al. (2007) Rice *WRKY45* plays a crucial role in benzothiadiazole-inducible blast resistance. The Plant Cell 19: 2064–2076.
- Peng Y, Bartley LE, Chen X, Dardick C, Chern M, et al. (2008) *OsWRKY62* is a negative regulator of basal and Xa21-mediated defense against *Xanthomonas oryzae* pv. *oryzae* in rice. Molecular Plant 1: 446–458.
- Nemoto T, Okada K, Okada K, Shibuya N, Toyomasu T, et al. (2007) Promoter analysis of the rice stemar-13-ene synthase gene *OsDTC2*, which is involved in the biosynthesis of the phytoalexin oryzaalexin S. Biochimica et Biophysica Acta 1769: 678–683.
- Peng Y, Bartley LE, Canlas P, Ronald PC (2010) OsWRKY1a Transcription Factors Modulate Rice Innate Immunity. Rice (New York, NY) 3: 36–42.
- Park C-J, Ronald PC (2012) Cleavage and nuclear localization of the rice XA21 immune receptor. Nature communications 3: 920.

54. Fritz-Laylin L, Krishnamurthy N (2005) Phylogenomic analysis of the receptor-like proteins of rice and Arabidopsis. *Plant Physiology* 138: 611–623.
55. Yang X, Deng F, Ramonell KM (2012) Receptor-like kinases and receptor-like proteins: keys to pathogen recognition and defense signaling in plant innate immunity. *Frontiers in Biology* 7: 155–166.
56. Brutus A, Sicilia F, Macone A, Cervone F, De Lorenzo G (2010) A domain swap approach reveals a role of the plant wall-associated kinase 1 (WAK1) as a receptor of oligogalacturonides. *Proc Natl Acad Sci USA* 107: 9452–9457.
57. Tör M, Lotze MT, Holton N (2009) Receptor-mediated signalling in plants: molecular patterns and programmes. *Journal of Experimental Botany* 60: 3645–3654.
58. Li H, Zhou S-Y, Zhao W-S, Su S-C, Peng Y-L (2009) A novel wall-associated receptor-like protein kinase gene, *OsWAK1*, plays important roles in rice blast disease resistance. *Plant Molecular Biology* 69: 337–346.
59. Kaku H, Nishizawa Y (2006) Plant cells recognize chitin fragments for defense signaling through a plasma membrane receptor. *Proc Natl Acad Sci USA* 103: 11086–11091.
60. Shimizu T, Nakano T, Takamizawa D, Desaki Y, Ishii-Minami N, et al. (2010) Two LysM receptor molecules, CEBiP and OsCERK1, cooperatively regulate chitin elicitor signaling in rice. *The Plant Journal* 64: 204–214.
61. Hamel L-P, Nicole M-C, Sritubtim S, Morency M-J, Ellis M, et al. (2006) Ancient signals: comparative genomics of plant *MAPK* and *MAPKK* gene families. *Trends in Plant Science* 11: 192–198.
62. Kishi-Kaboshi M, Okada K, Kurimoto L, Murakami S, Umezawa T, et al. (2010) A rice fungal MAMP-responsive MAPK cascade regulates metabolic flow to antimicrobial metabolite synthesis. *The Plant Journal* 63: 599–612.
63. Jung K-H, Cao P, Seo Y-S, Dardick C, Ronald PC (2010) The Rice Kinase Phylogenomics Database: a guide for systematic analysis of the rice kinase superfamily. *Trends in Plant Science* 15: 595–599.
64. Grover A (2012) Plant Chitinases: Genetic Diversity and Physiological Roles. *Critical Reviews in Plant Sciences* 31: 57–73.
65. Bishop JG, Dean A M, Mitchell-Olds T (2000) Rapid evolution in plant chitinases: molecular targets of selection in plant-pathogen coevolution. *Proc Natl Acad Sci USA* 97: 5322–5327.
66. Damasceno C, Bishop J (2008) Structure of the glucanase inhibitor protein (GIP) family from *Phytophthora* species suggests coevolution with plant endo- $\beta$ -1, 3-glucanases. *Molecular Plant-Microbe Interactions* 21: 820–830.
67. Shibuya N, Minami E (2001) Oligosaccharide signalling for defence responses in plant. *Physiological and Molecular Plant Pathology* 59: 223–233.
68. Ballini E, Morel J-B, Droc G, Price A, Courtois B, et al. (2008) A genome-wide meta-analysis of rice blast resistance genes and quantitative trait loci provides new insights into partial and complete resistance. *Molecular Plant-Microbe Interactions* 21: 859–868.
69. Gu K, Yang B, Tian D, Wu L, Wang D, et al. (2005) R gene expression induced by a type-III effector triggers disease resistance in rice. *Nature* 435: 1122–1125.
70. Yuan B, Zhai C, Wang W, Zeng X, Xu X, et al. (2011) The Pik-p resistance to *Magnaporthe oryzae* in rice is mediated by a pair of closely linked CC-NBS-LRR genes. *Theoretical and Applied Genetics* 122: 1017–1028.
71. Li Y, Xia Q, Kou H, Wang D, Lin X, et al. (2011) Induced Pib expression and resistance to *Magnaporthe grisea* are compromised by cytosine demethylation at critical promoter regions in rice. *Journal of Integrative Plant Biology* 53: 814–823.
72. Dou D, Kale SD, Wang X, Chen Y, Wang Q, et al. (2008) Conserved C-terminal motifs required for avirulence and suppression of cell death by *Phytophthora sojae* effector Avr1b. *The Plant Cell* 20: 1118–1133.
73. He P, Shan L, Sheen J (2007) Elicitation and suppression of microbe-associated molecular pattern-triggered immunity in plant-microbe interactions. *Cellular Microbiology* 9: 1385–1396.
74. Houterman P, Speijer D (2007) The mixed xylem sap proteome of *Fusarium oxysporum*-infected tomato plants. *Molecular Plant* 8: 215–221.
75. Houterman PM, Cornelissen BJC, Rep M (2008) Suppression of plant resistance gene-based immunity by a fungal effector. *PLoS Pathogens* 4: e1000061.
76. Abbruscato P, Nepusz T, Mizzi L, Del Corvo M, Morandini P, et al. (2012) *OsWRKY22*, a monocot *WRKY* gene, plays a role in the resistance response to blast. *Molecular Plant Pathology* doi: 10.1111/j.1364-3703.2012.00795.x.
77. Gingerich DJ, Hanada K, Shiu S-H, Vierstra (2007) Large-scale, lineage-specific expansion of a Bric-a-Brac/Tramtrack/Broad complex ubiquitin-ligase gene family in rice. *The Plant Cell* 19: 2329–2348.
78. Wang Z, Gerstein M, Snyder M (2009) RNA-Seq: a revolutionary tool for transcriptomics. *Nature Reviews Genetics* 10: 57–63.
79. Jain M, Nijhawan A, Tyagi AK, Khurana JP (2006) Validation of housekeeping genes as internal control for studying gene expression in rice by quantitative real-time PCR. *Biochemical and Biophysical Research Communications* 345: 646–651.
80. Livak KJ, Schmittgen TD (2001) Analysis of relative gene expression data using Real-Time quantitative PCR and the  $2^{-\Delta\Delta Ct}$  method. *Methods* 25: 402–408.
81. Wang B-B, Brendel V (2006) Genomewide comparative analysis of alternative splicing in plants. *Proc Natl Acad Sci USA* 103: 7175–7180.
82. Anders S, Huber W (2010) Differential expression analysis for sequence count data. *Genome Biology* 11: R106.
83. Trapnell C, Williams BA, Pertea G, Mortazavi A, Kwan G, et al. (2010) Transcript assembly and quantification by RNA-Seq reveals unannotated transcripts and isoform switching during cell differentiation. *Nature Biotechnology* 28: 511–515.
84. Trapnell C, Roberts A, Goff L, Pertea G, Kim D, et al. (2012) Differential gene and transcript expression analysis of RNA-seq experiments with TopHat and Cufflinks. *Nature Protocols* 7: 562–578.
85. Menges M, Dóczi R, Ökrész L, Morandini P, Mizzi L, et al. (2008) Comprehensive gene expression atlas for the Arabidopsis MAP kinase signalling pathways. *New Phytologist* 179: 643–662.
86. Csardi G, Nepusz T (2006) The igraph software package for complex networks research. *InterJournal Complex Systems*, 1695.
87. Li H, Handsaker B, Wysoker A, Fennell T, Ruan J, et al. (2009) The Sequence Alignment/Map format and SAMtools. *Bioinformatics (Oxford, England)* 25: 2078–2079.
88. Rice WRKY Working Group (2012) Nomenclature report on rice WRKY's. Conflict regarding gene names and its solution. *Rice* 5: 3.
